# Supplementary material
Source: PubMed Central journal article supplement (PMC8338756)
Supplement: NIHMS1683912-supplement-1.pdf [file NIHMS1683912-supplement-1.pdf]

Step 1

Initial gene list (16339)

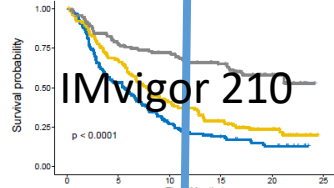

$Surv(Event, Time) \sim Gene_i + \log(TMB)$

Genes associated with better survival in IMvigor 210 (1193)

WGCNA

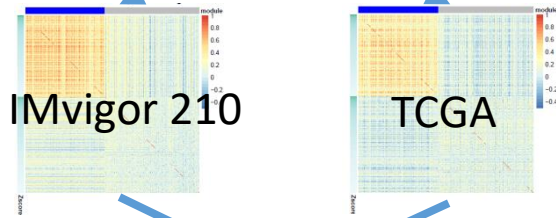

CCGM I (483)

Enriched with Interferon gamma response

Adaptive immune response

Step 2

Initial gene list (16339)

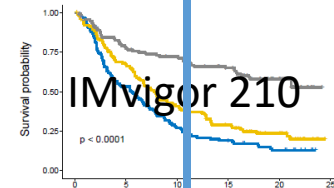

$Surv(Event, Time) \sim Gene_i + Score\_adaptive\_immune + \log(TMB)$

Genes associated with worse survival in IMvigor 210 (1498)

WGCNA

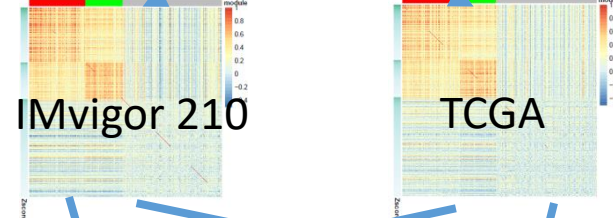

CCGM I (437)

Enriched with inflammatory genes

Pro-tumorigenic inflammation

CCGM II (287)

Enriched with EMT genes

Stromal
