# Supplementary material
Source: PubMed Central journal article supplement (PMC8338756)

## IMvigor210: Selecting optimal number of top signature genes

**A**

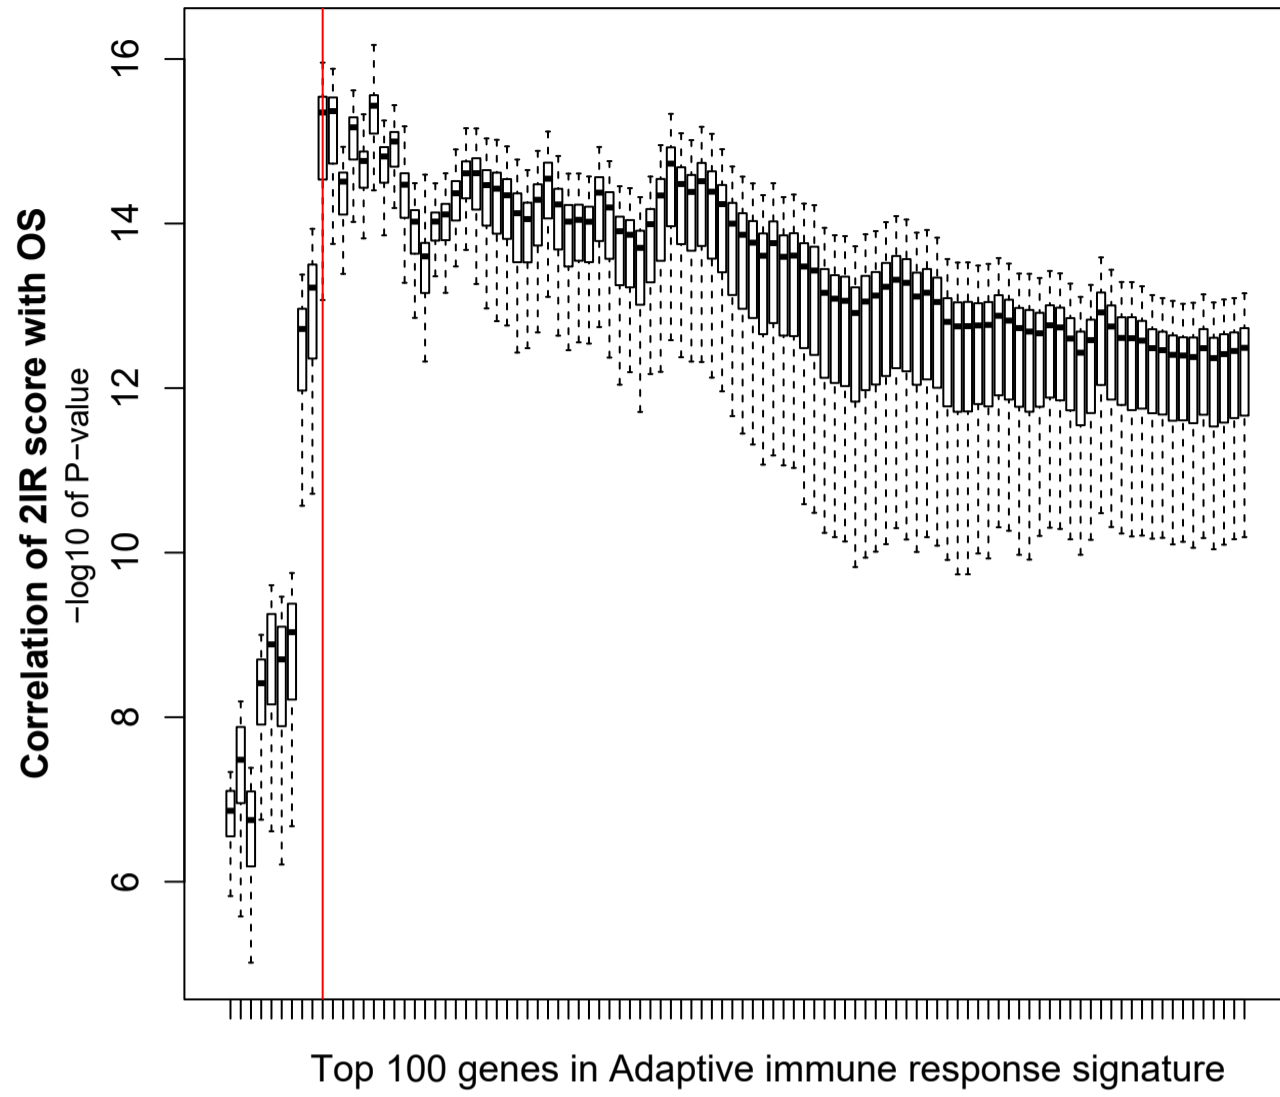

**B**

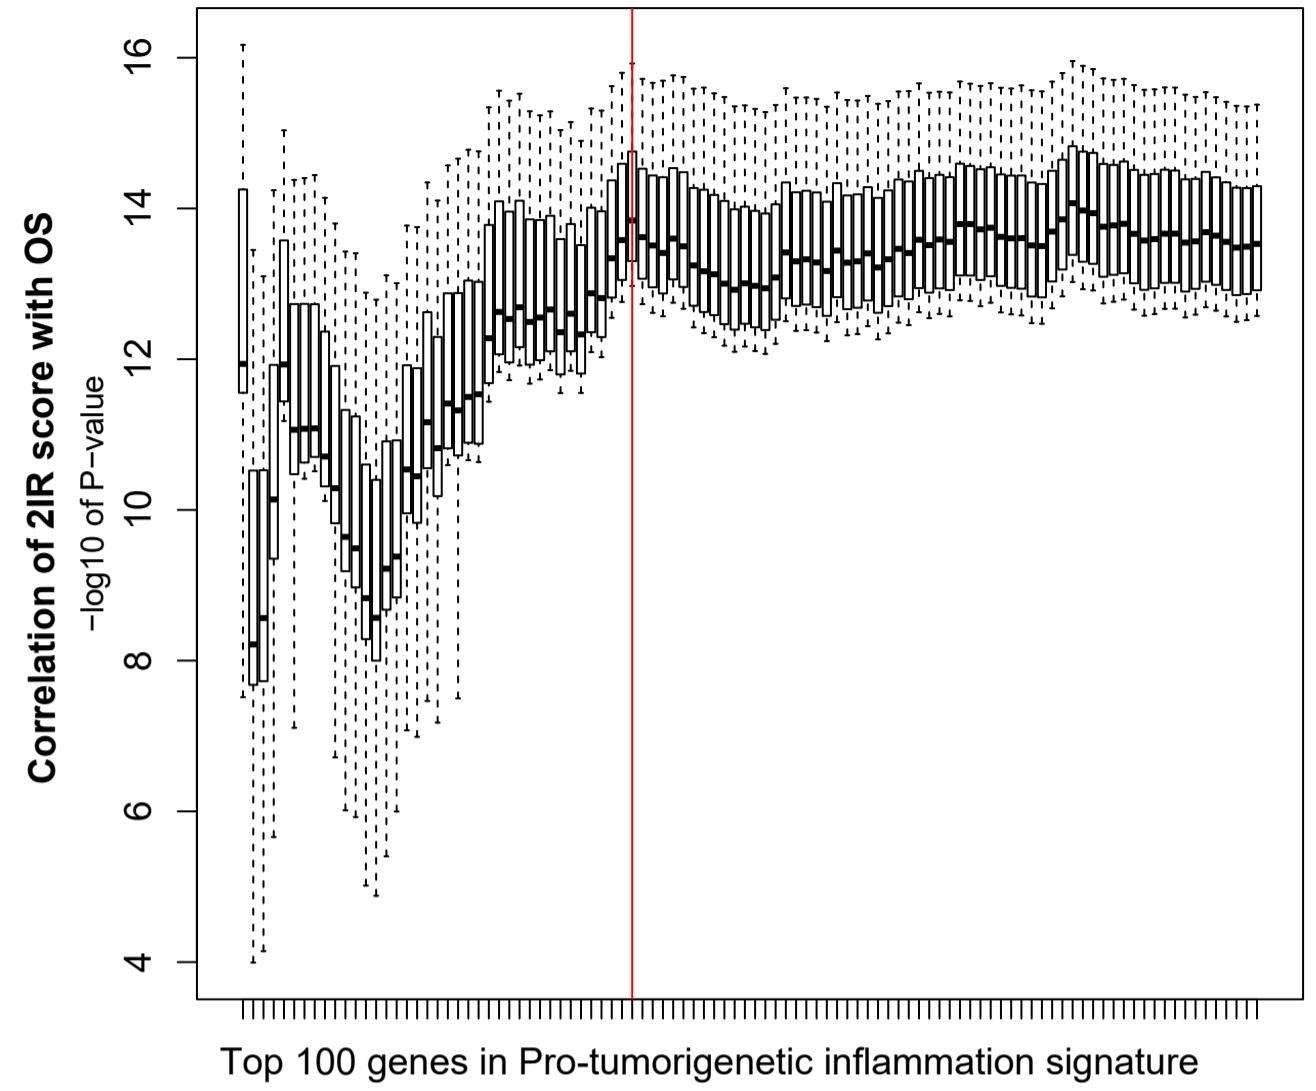

## IMvigor210: 2IR score calculated using top signature genes

**C**

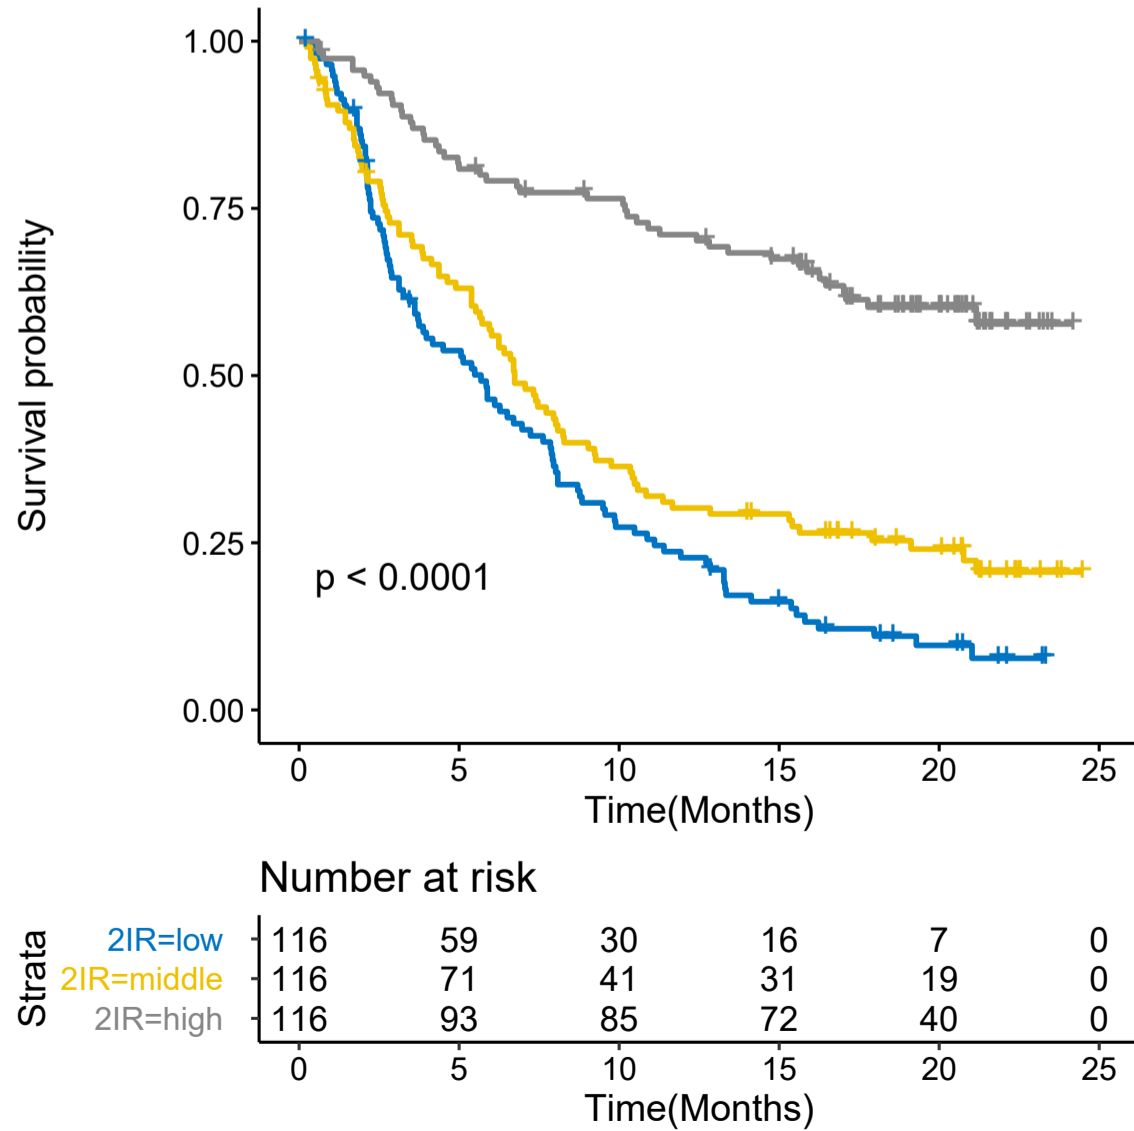

**D**

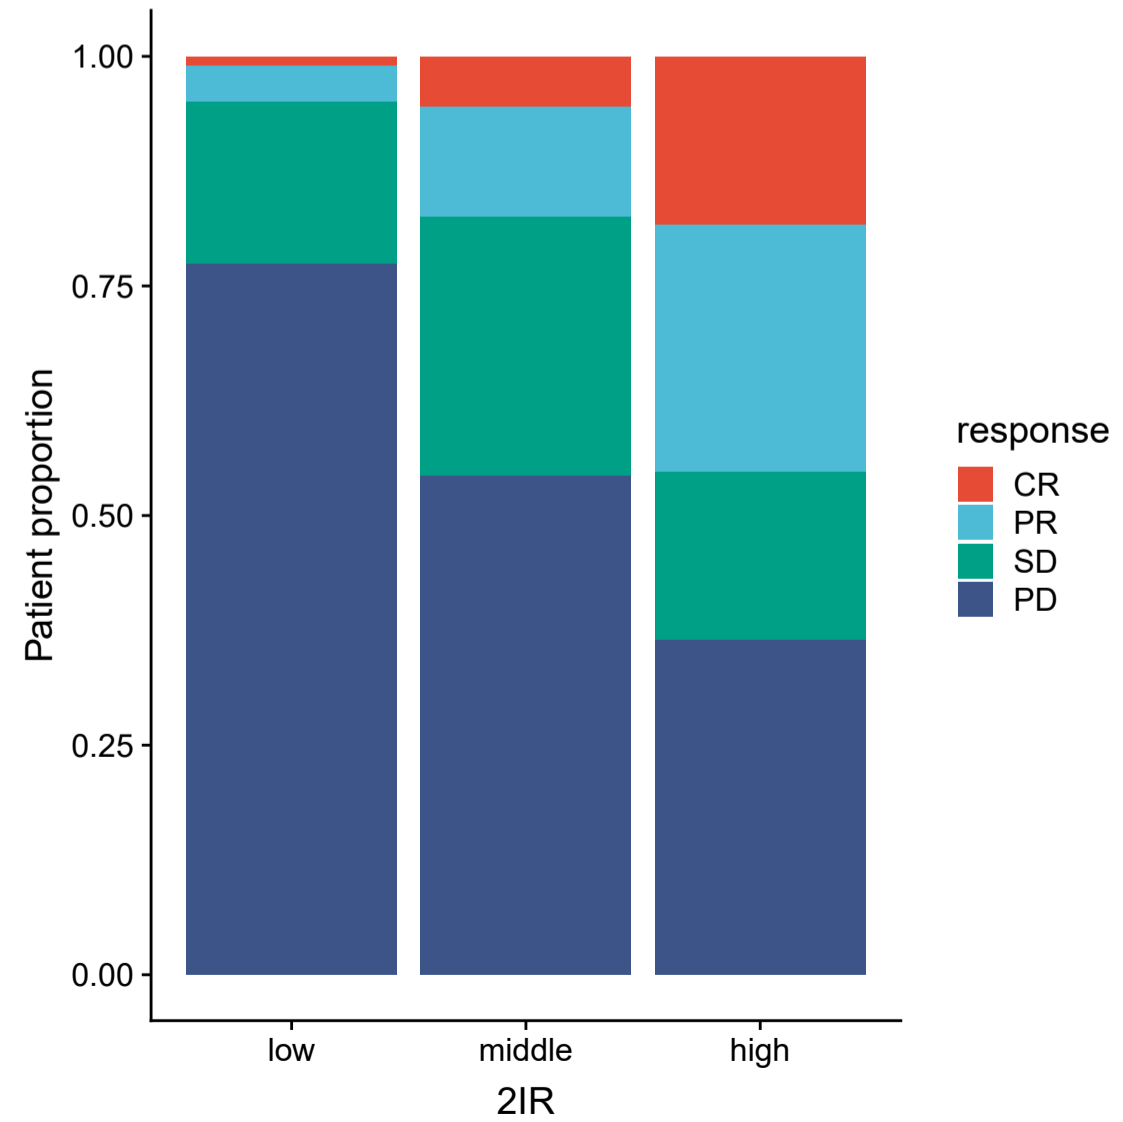

Supplement: NIHMS1683912-supplement-5.pdf [file NIHMS1683912-supplement-5.pdf]
