# Supplementary material
Source: PubMed Central journal article supplement (PMC8338756)
Supplement: NIHMS1683912-supplement-6.pdf [file NIHMS1683912-supplement-6.pdf]

Survival probability

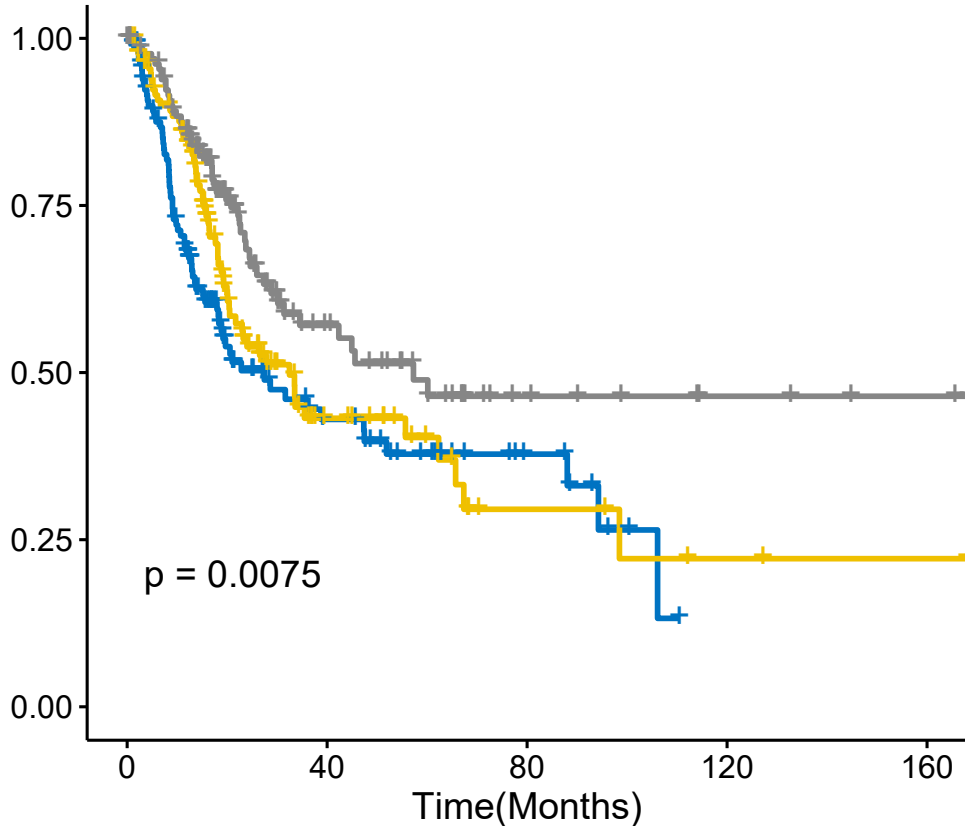

Number at risk

Strata

2IR=low  
2IR=middle  
2IR=high

| Time(Months) | 0   | 40 | 80 | 120 | 160 |
|--------------|-----|----|----|-----|-----|
| 2IR=low      | 136 | 27 | 9  | 0   | 0   |
| 2IR=middle   | 136 | 21 | 5  | 2   | 1   |
| 2IR=high     | 135 | 31 | 9  | 4   | 2   |
