# Supplementary material
Source: PubMed Central journal article supplement (PMC8338756)

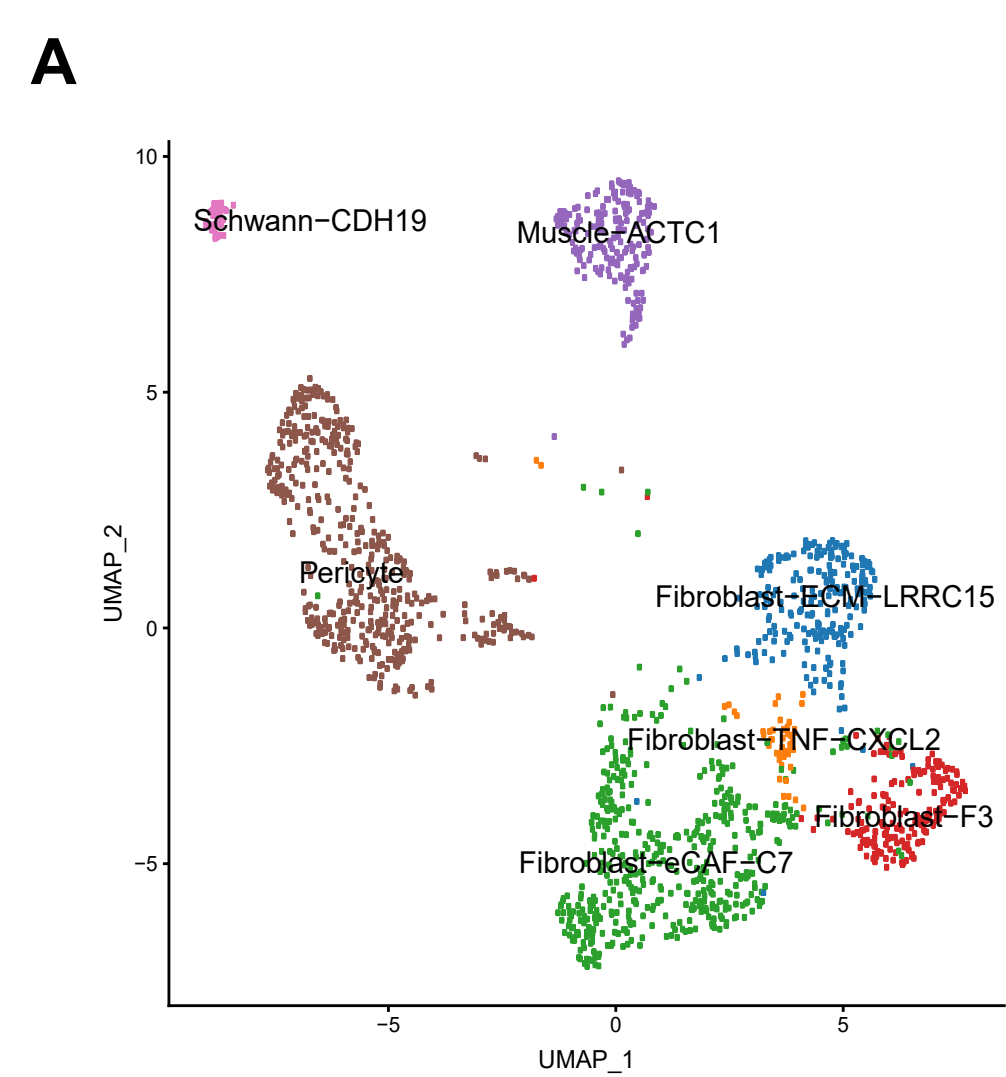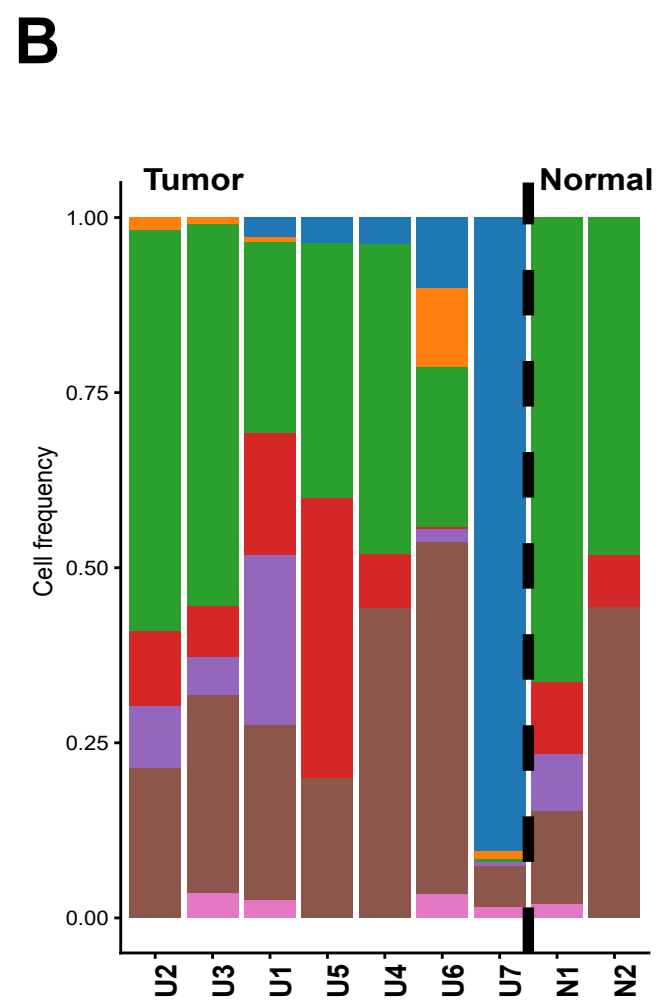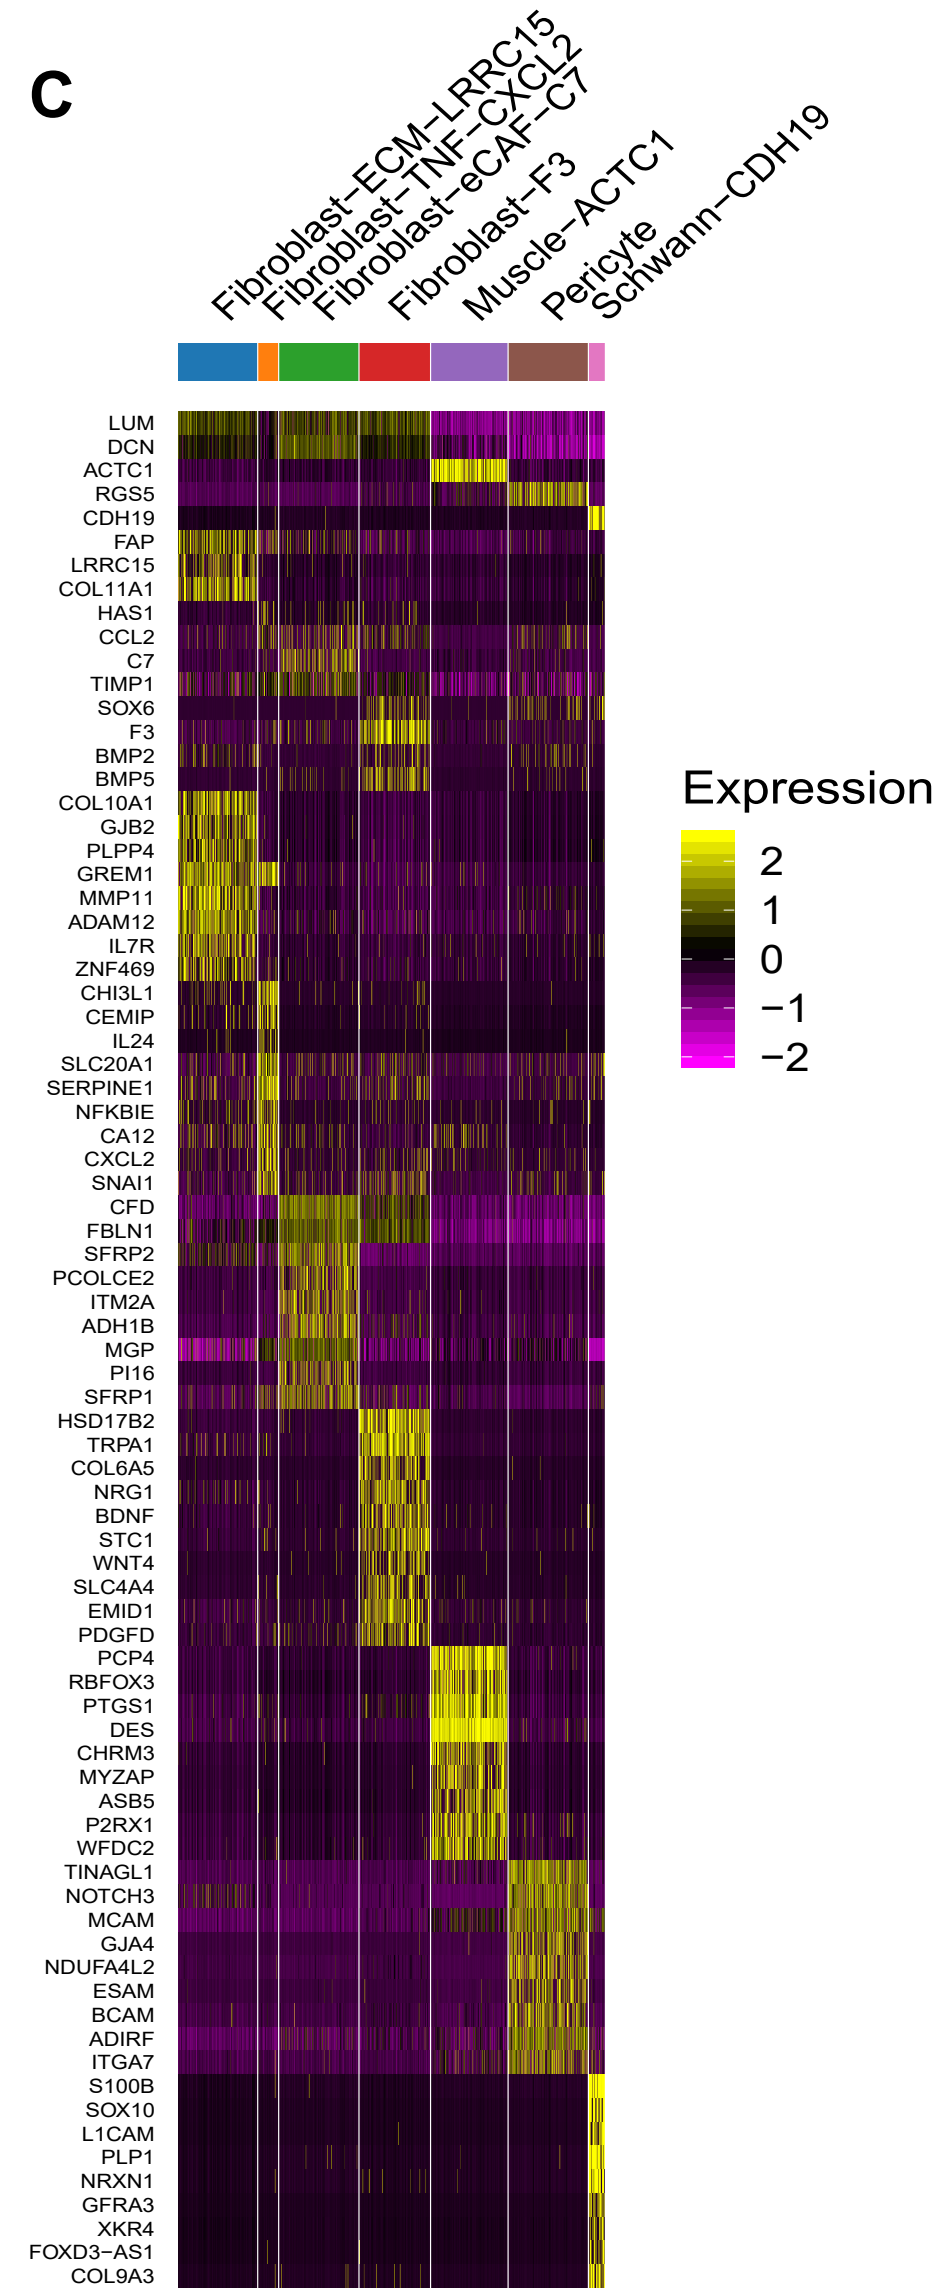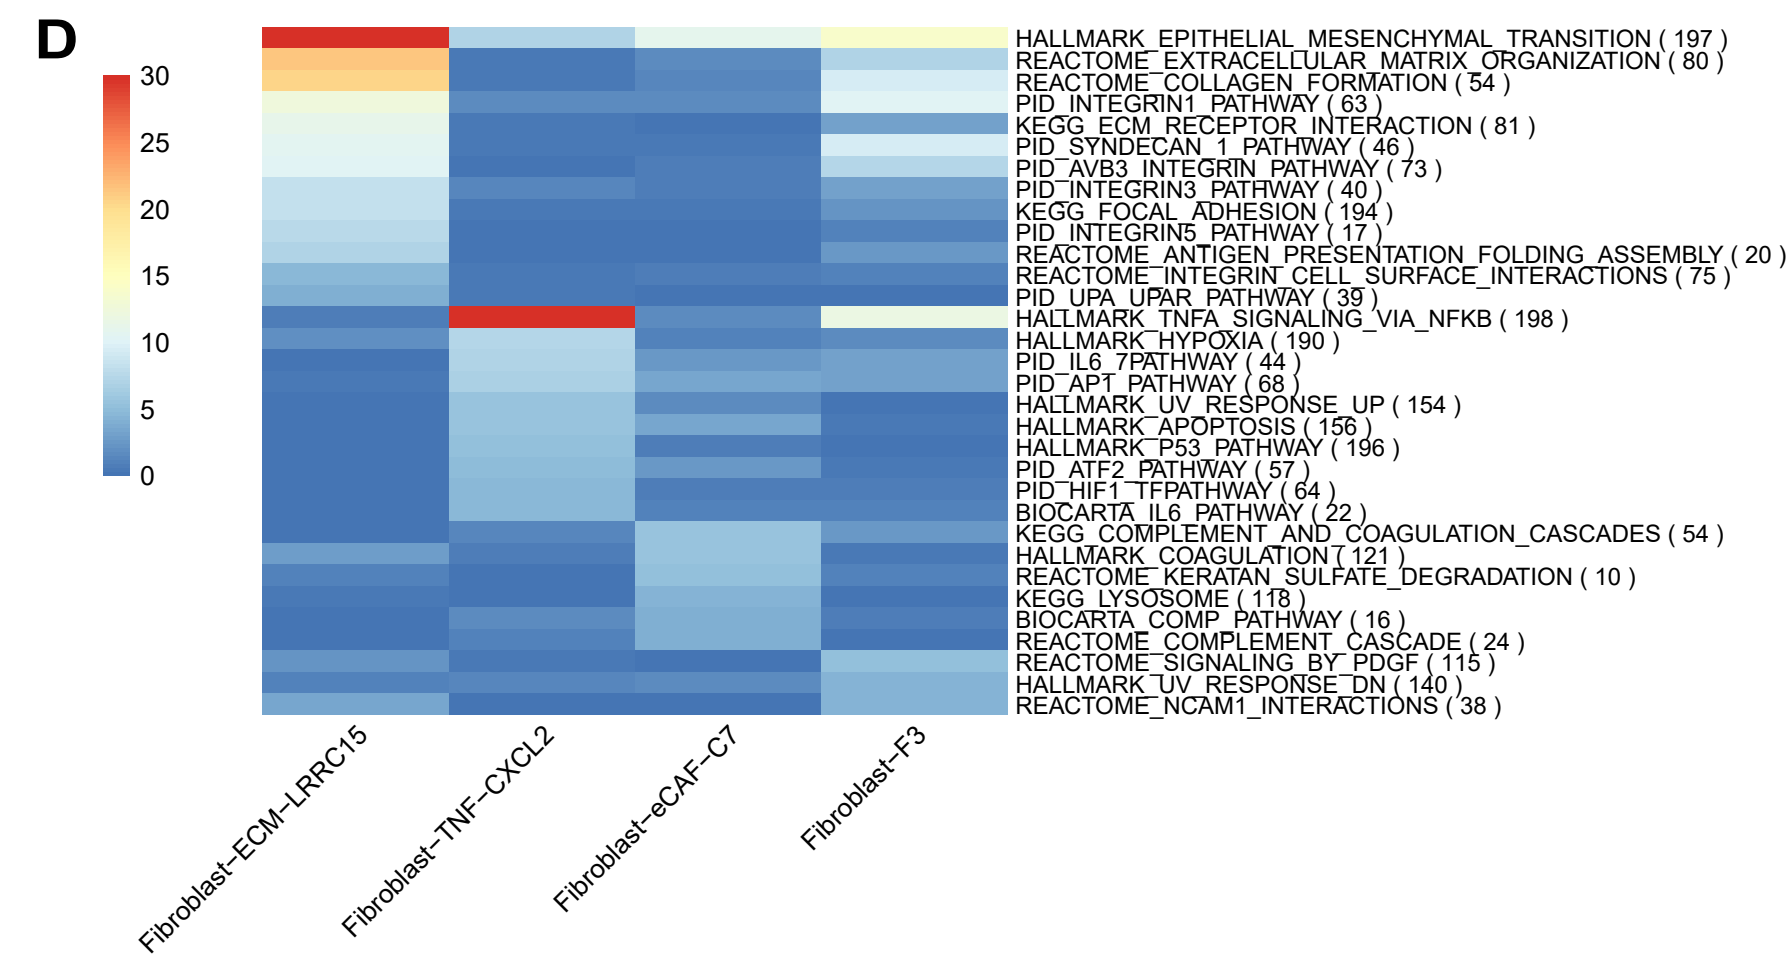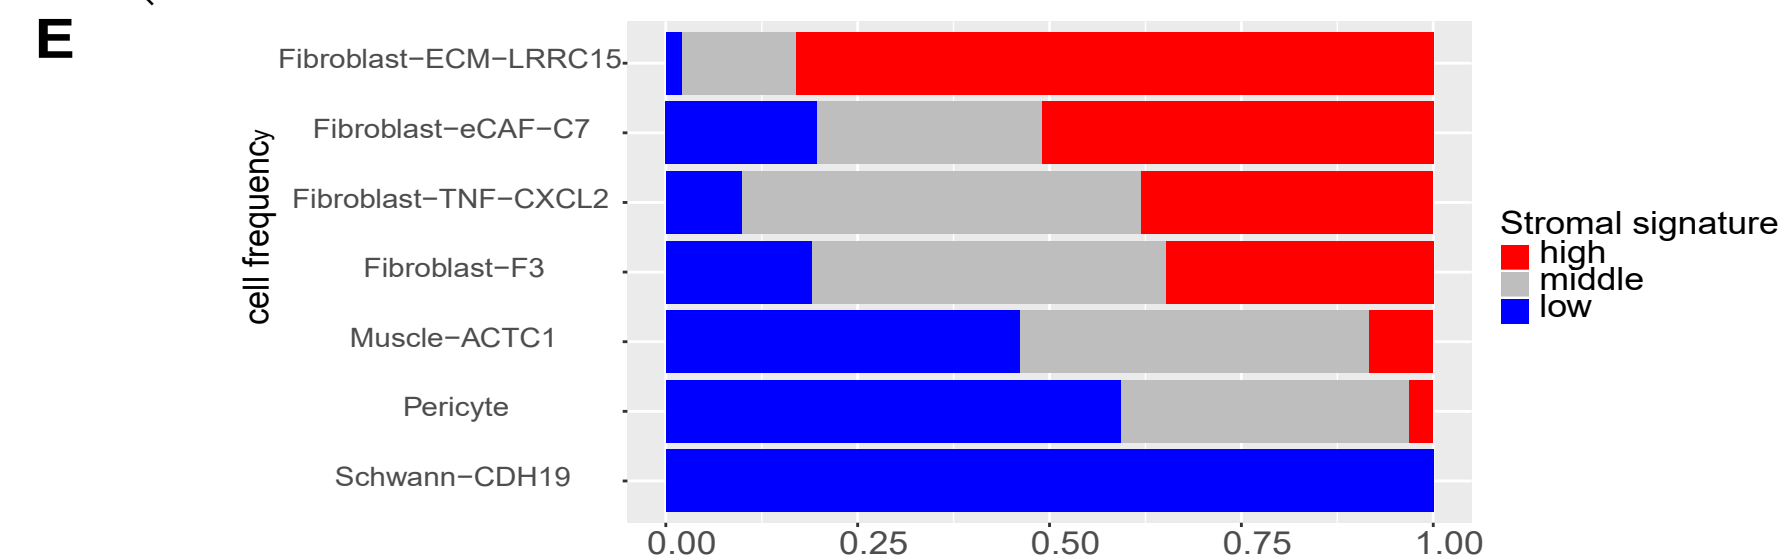

Supplement: NIHMS1683912-supplement-10.pdf [file NIHMS1683912-supplement-10.pdf]

**A**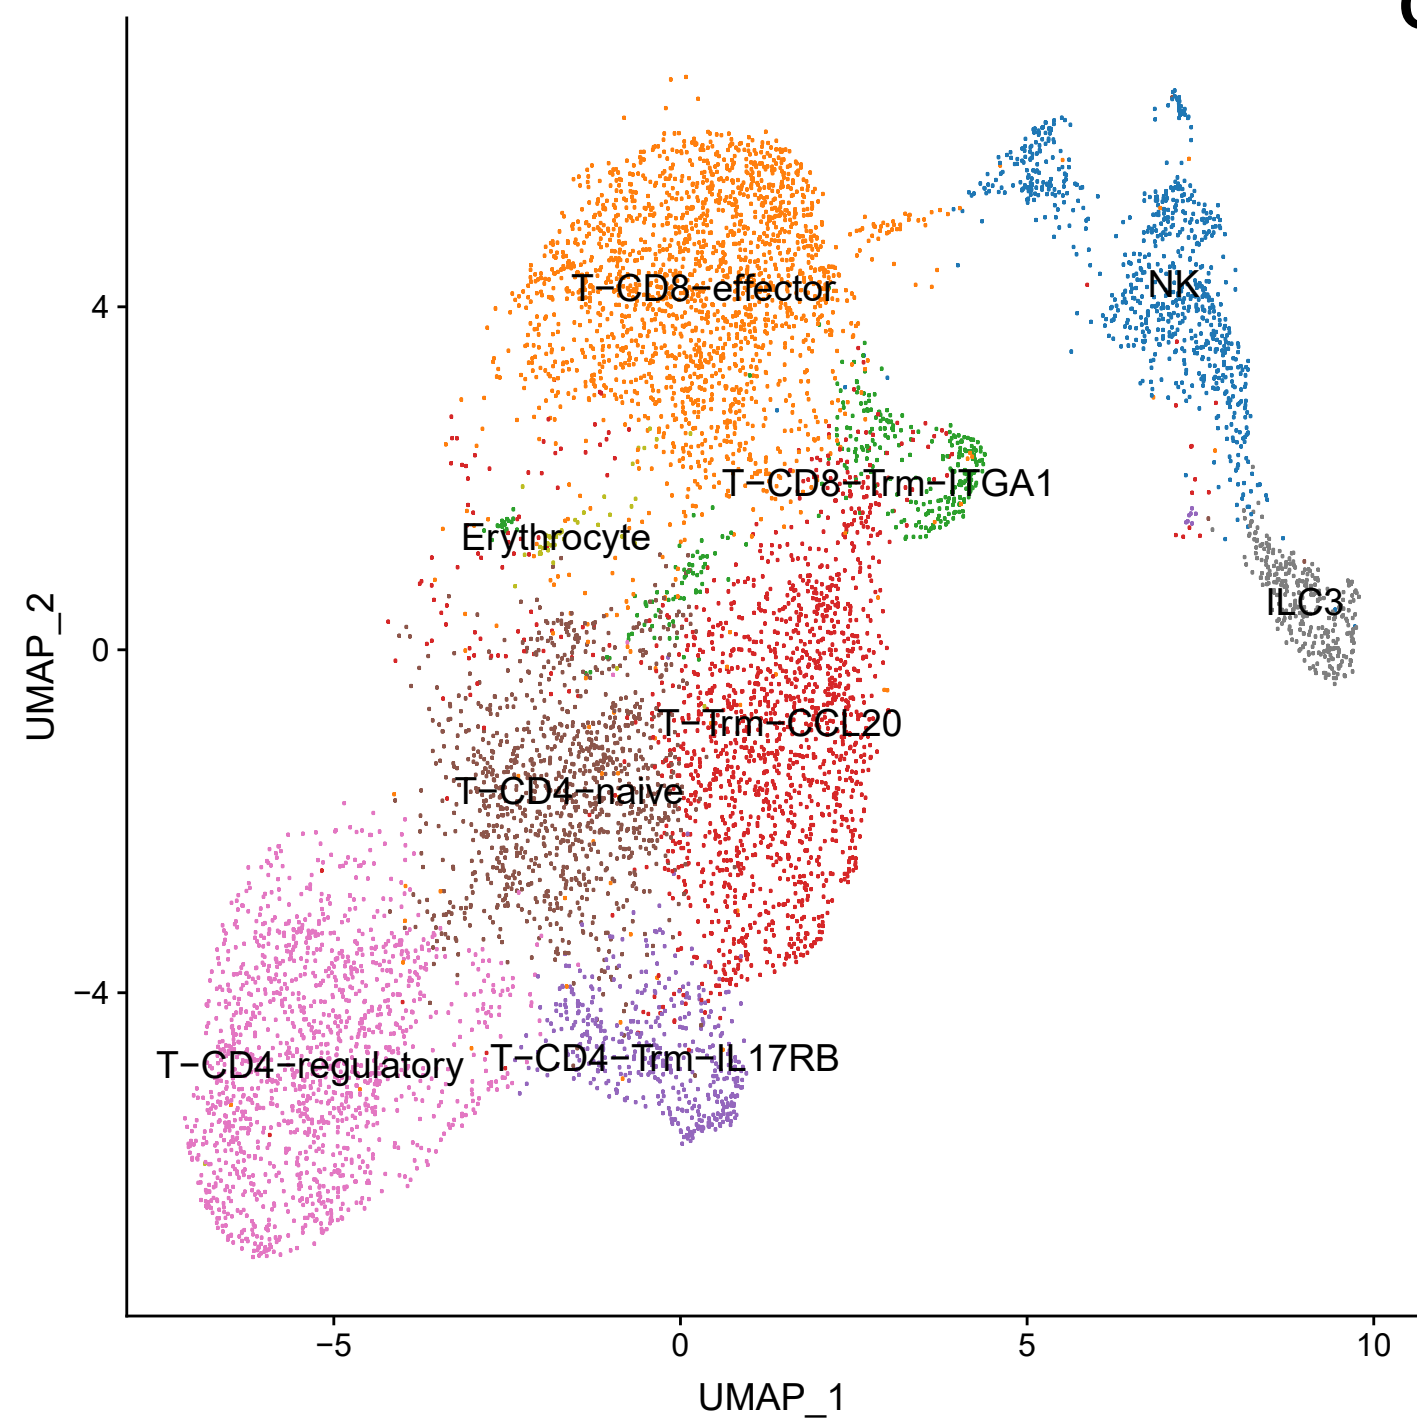**C**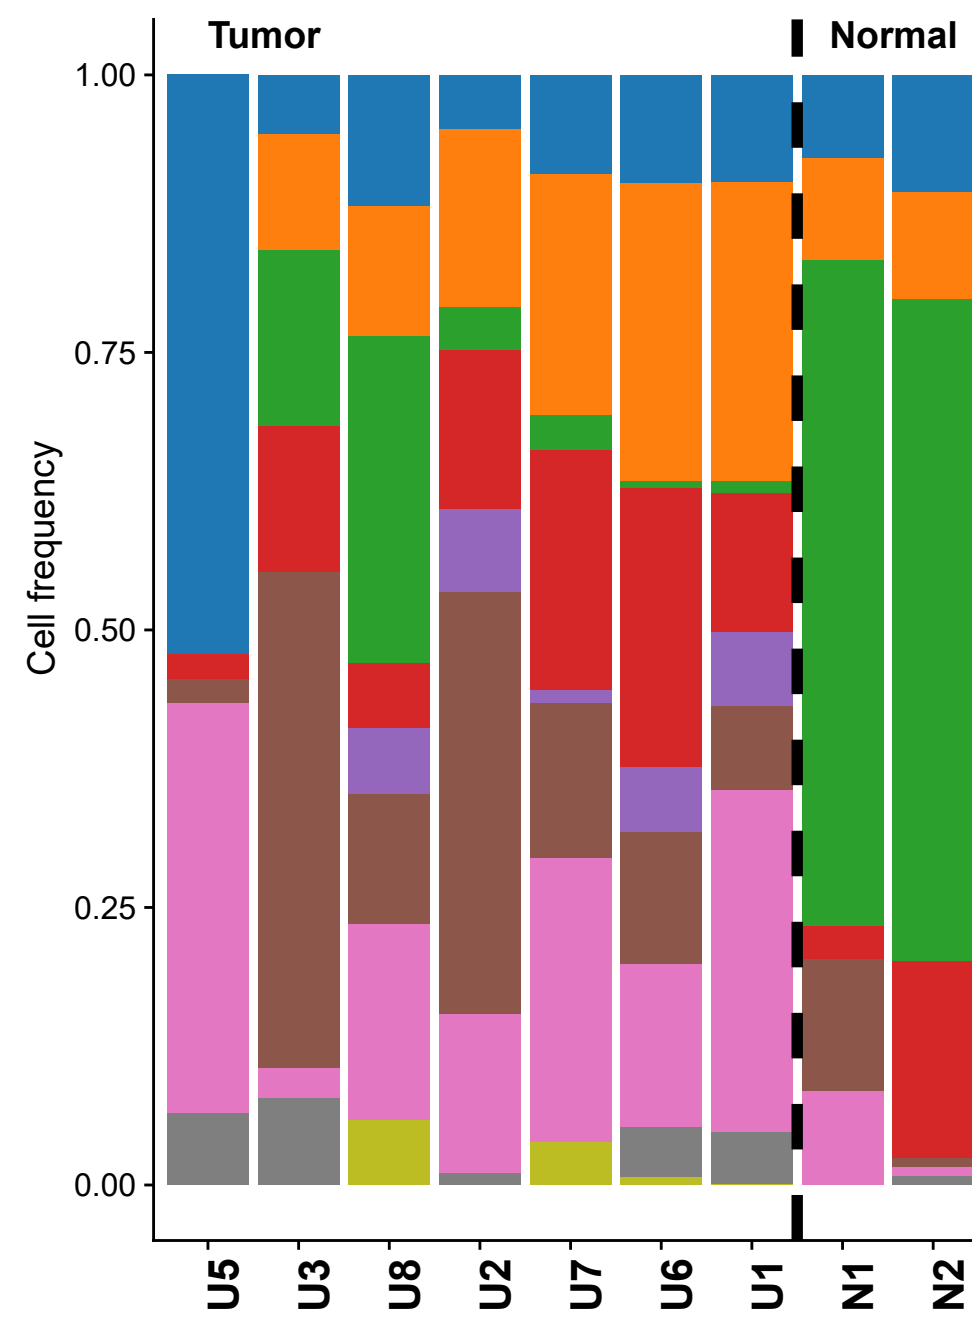**D**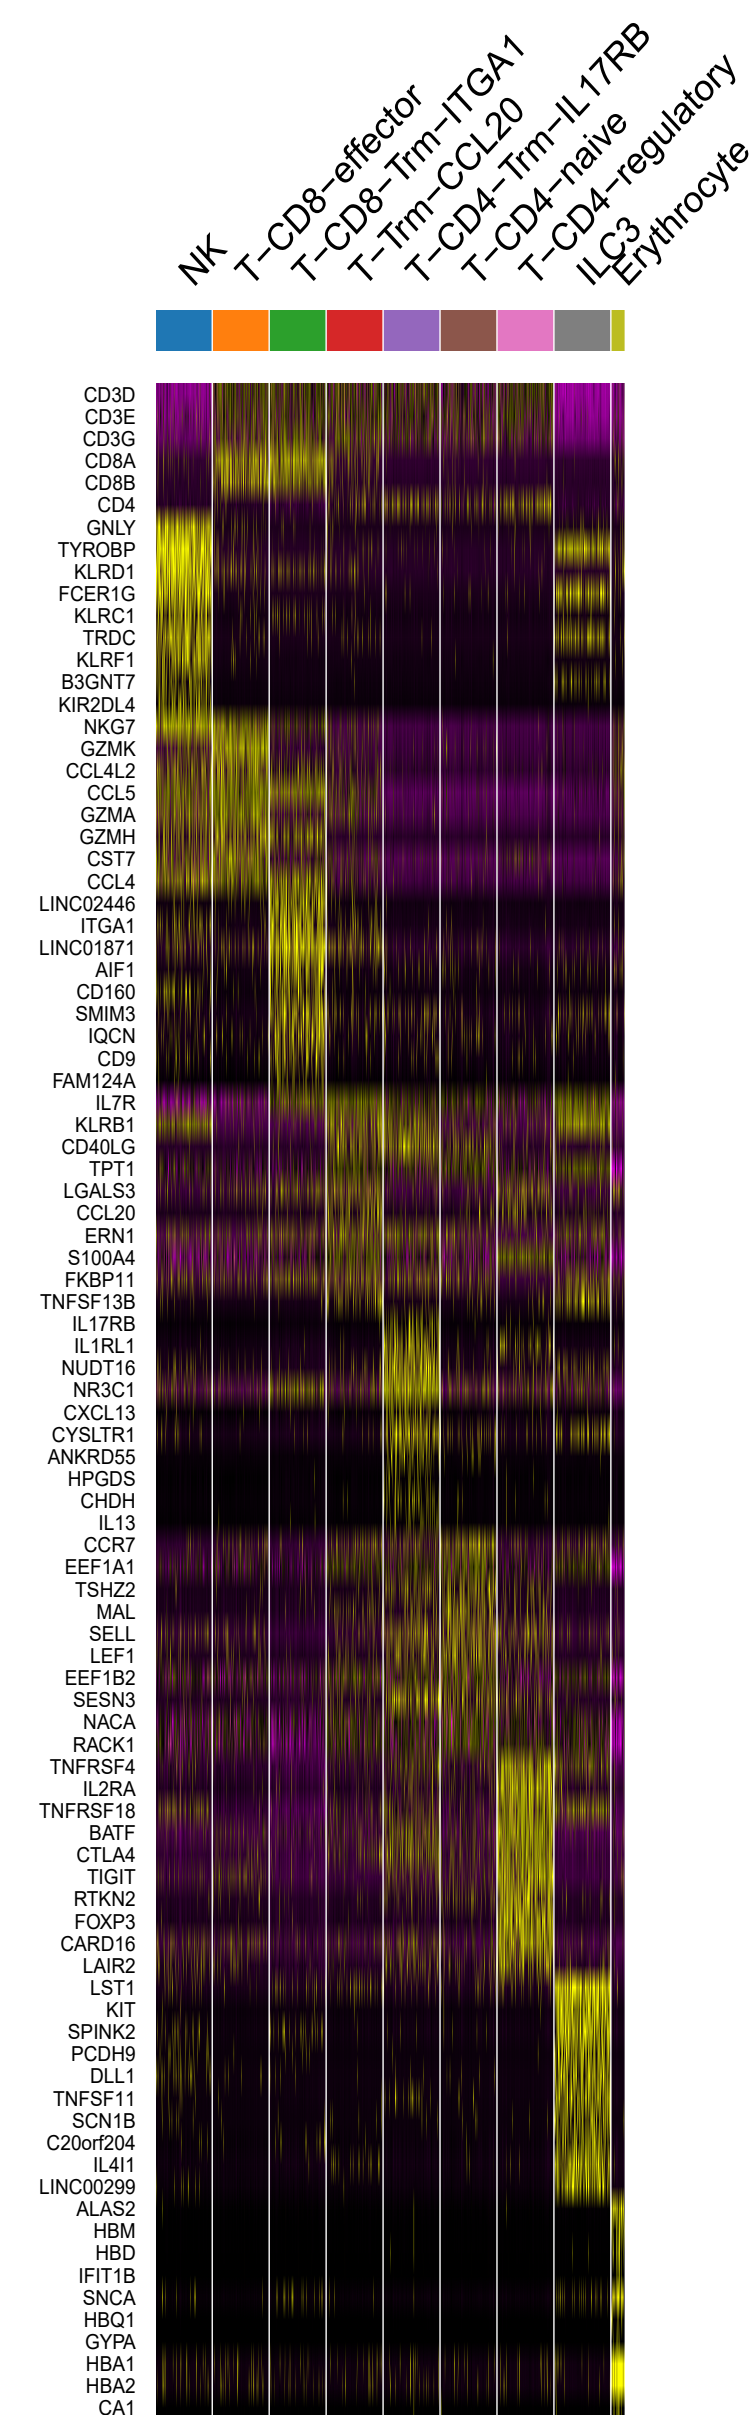**B**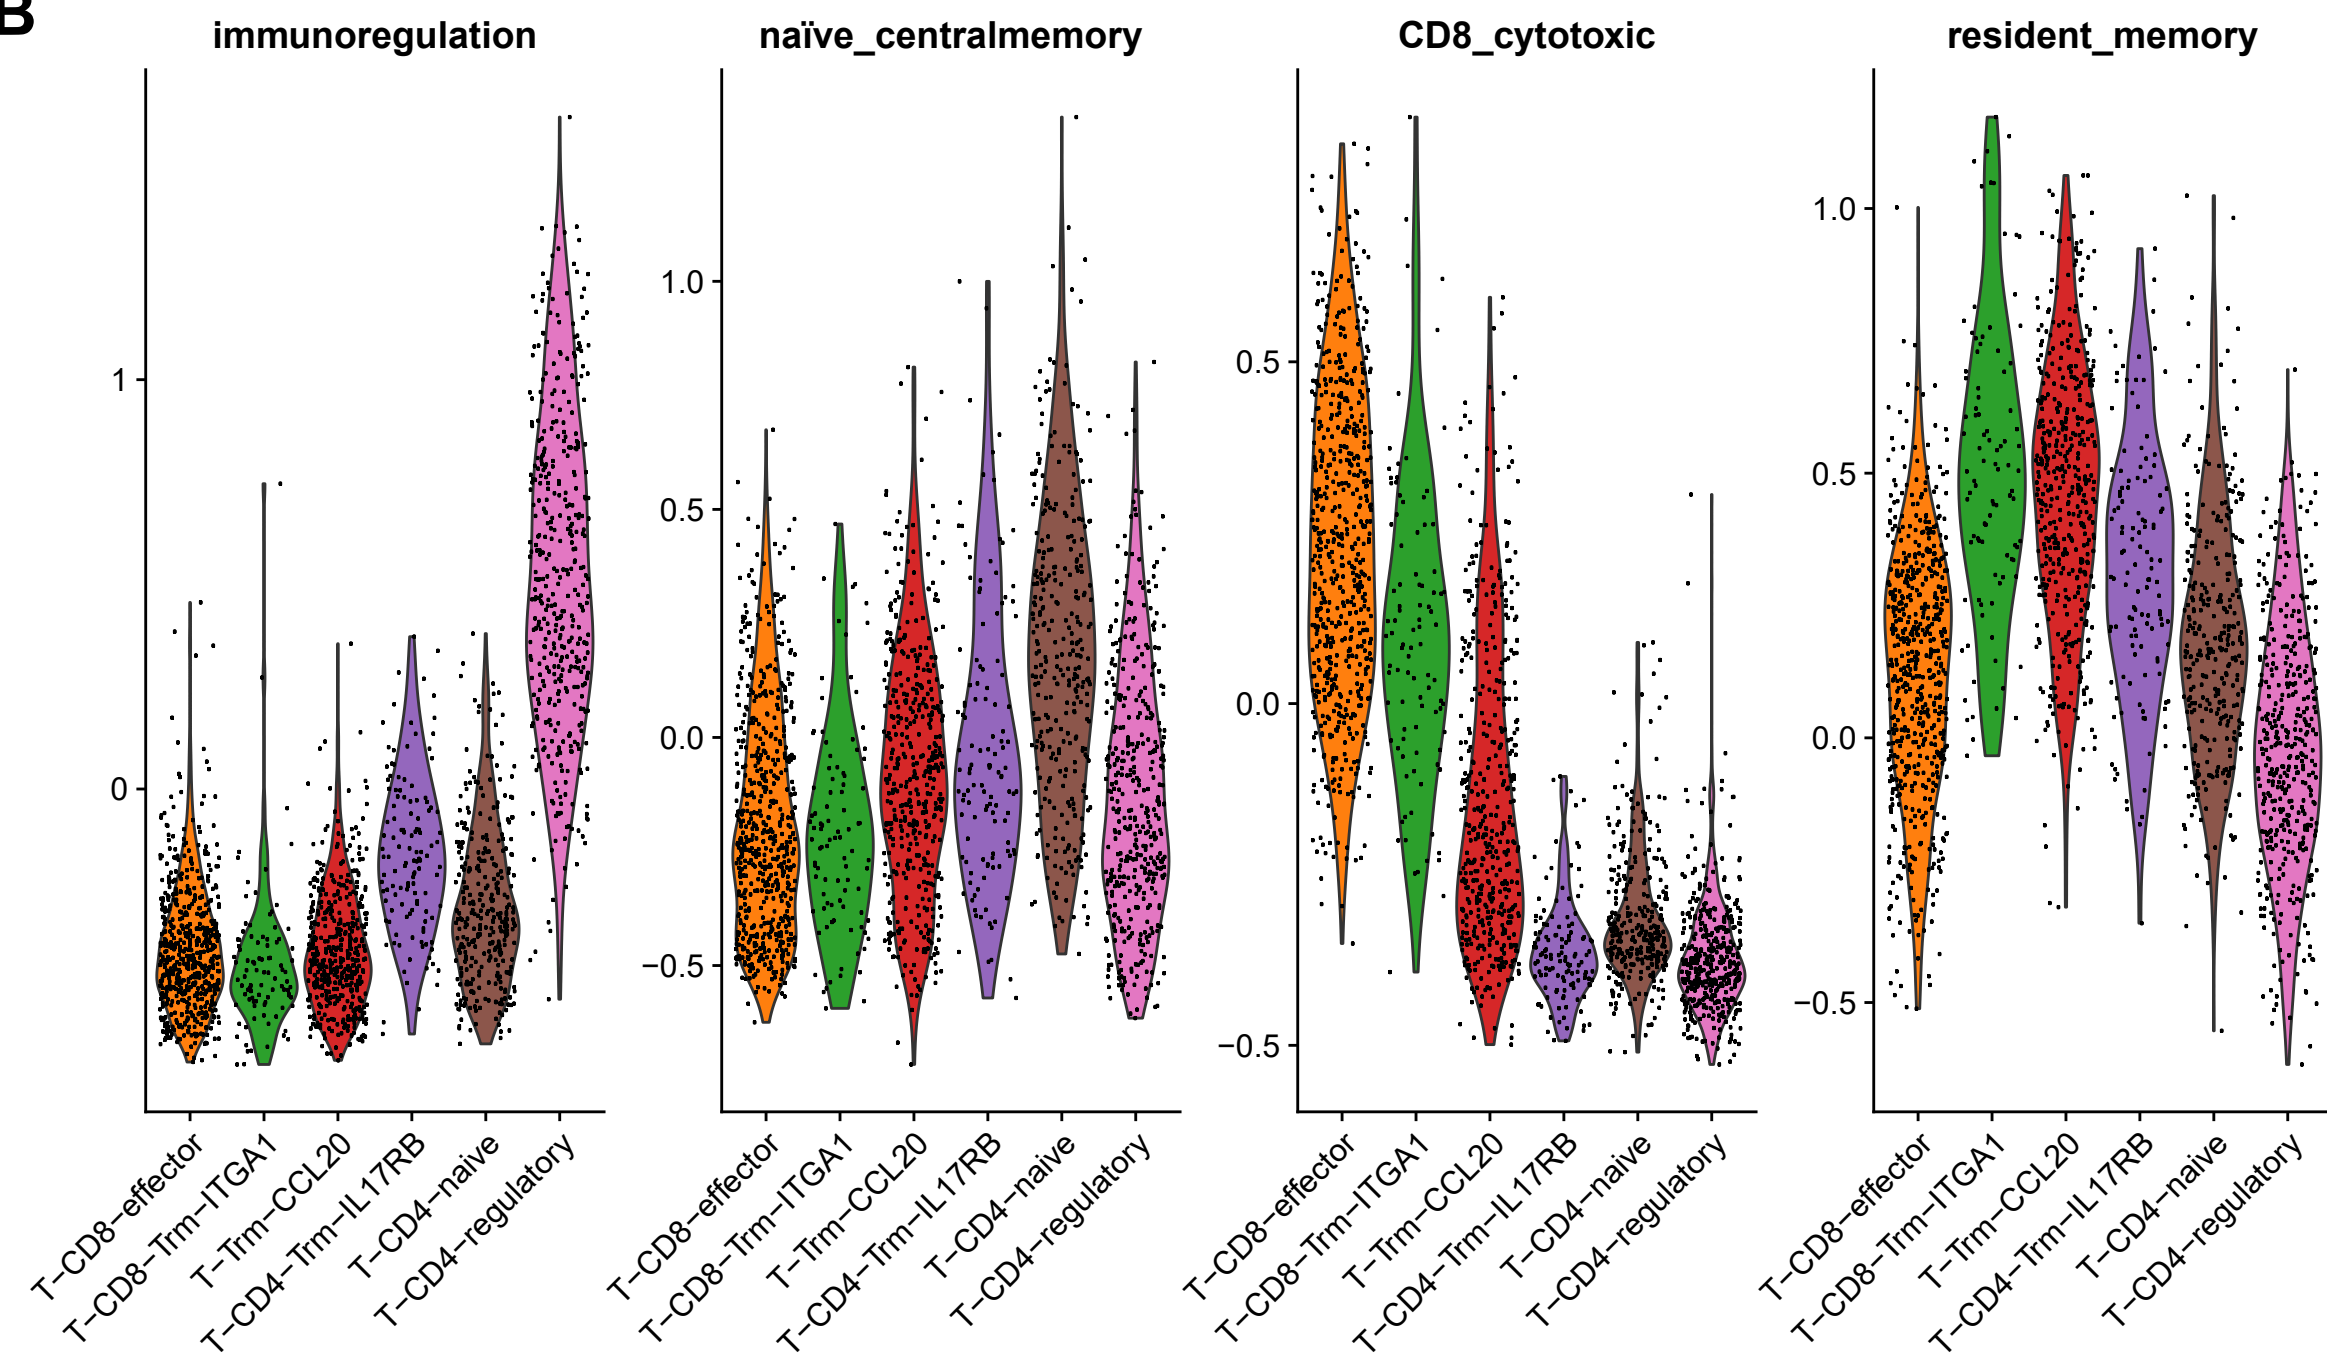

Supplement: NIHMS1683912-supplement-11.pdf [file NIHMS1683912-supplement-11.pdf]

**A**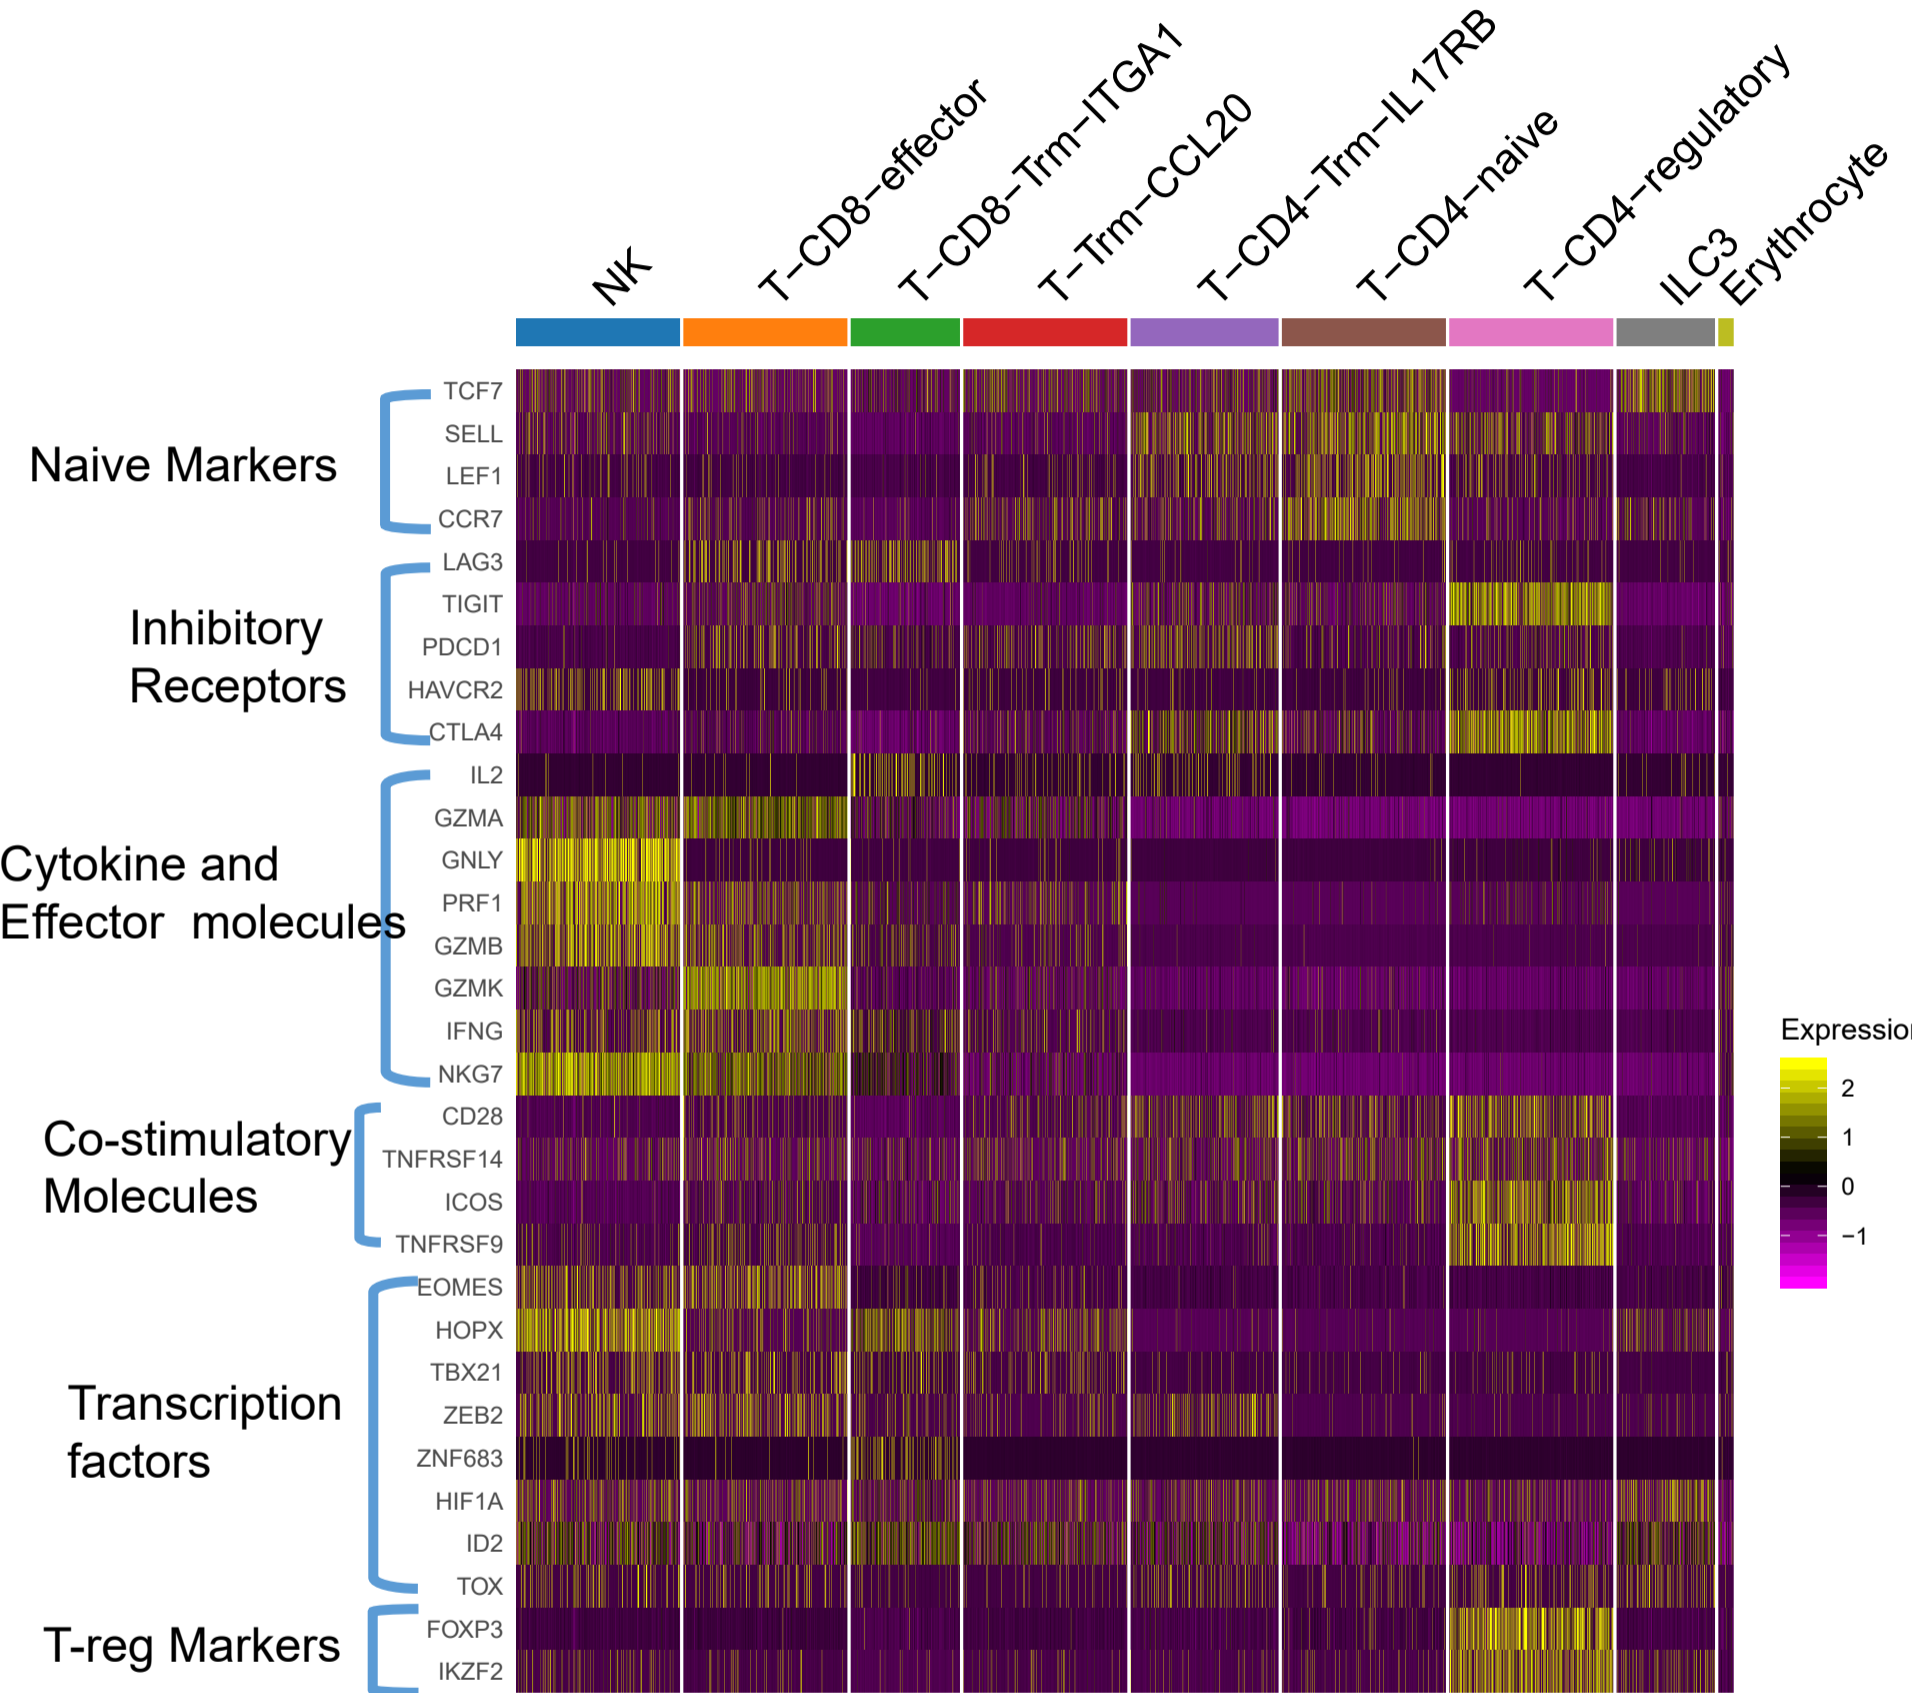**B**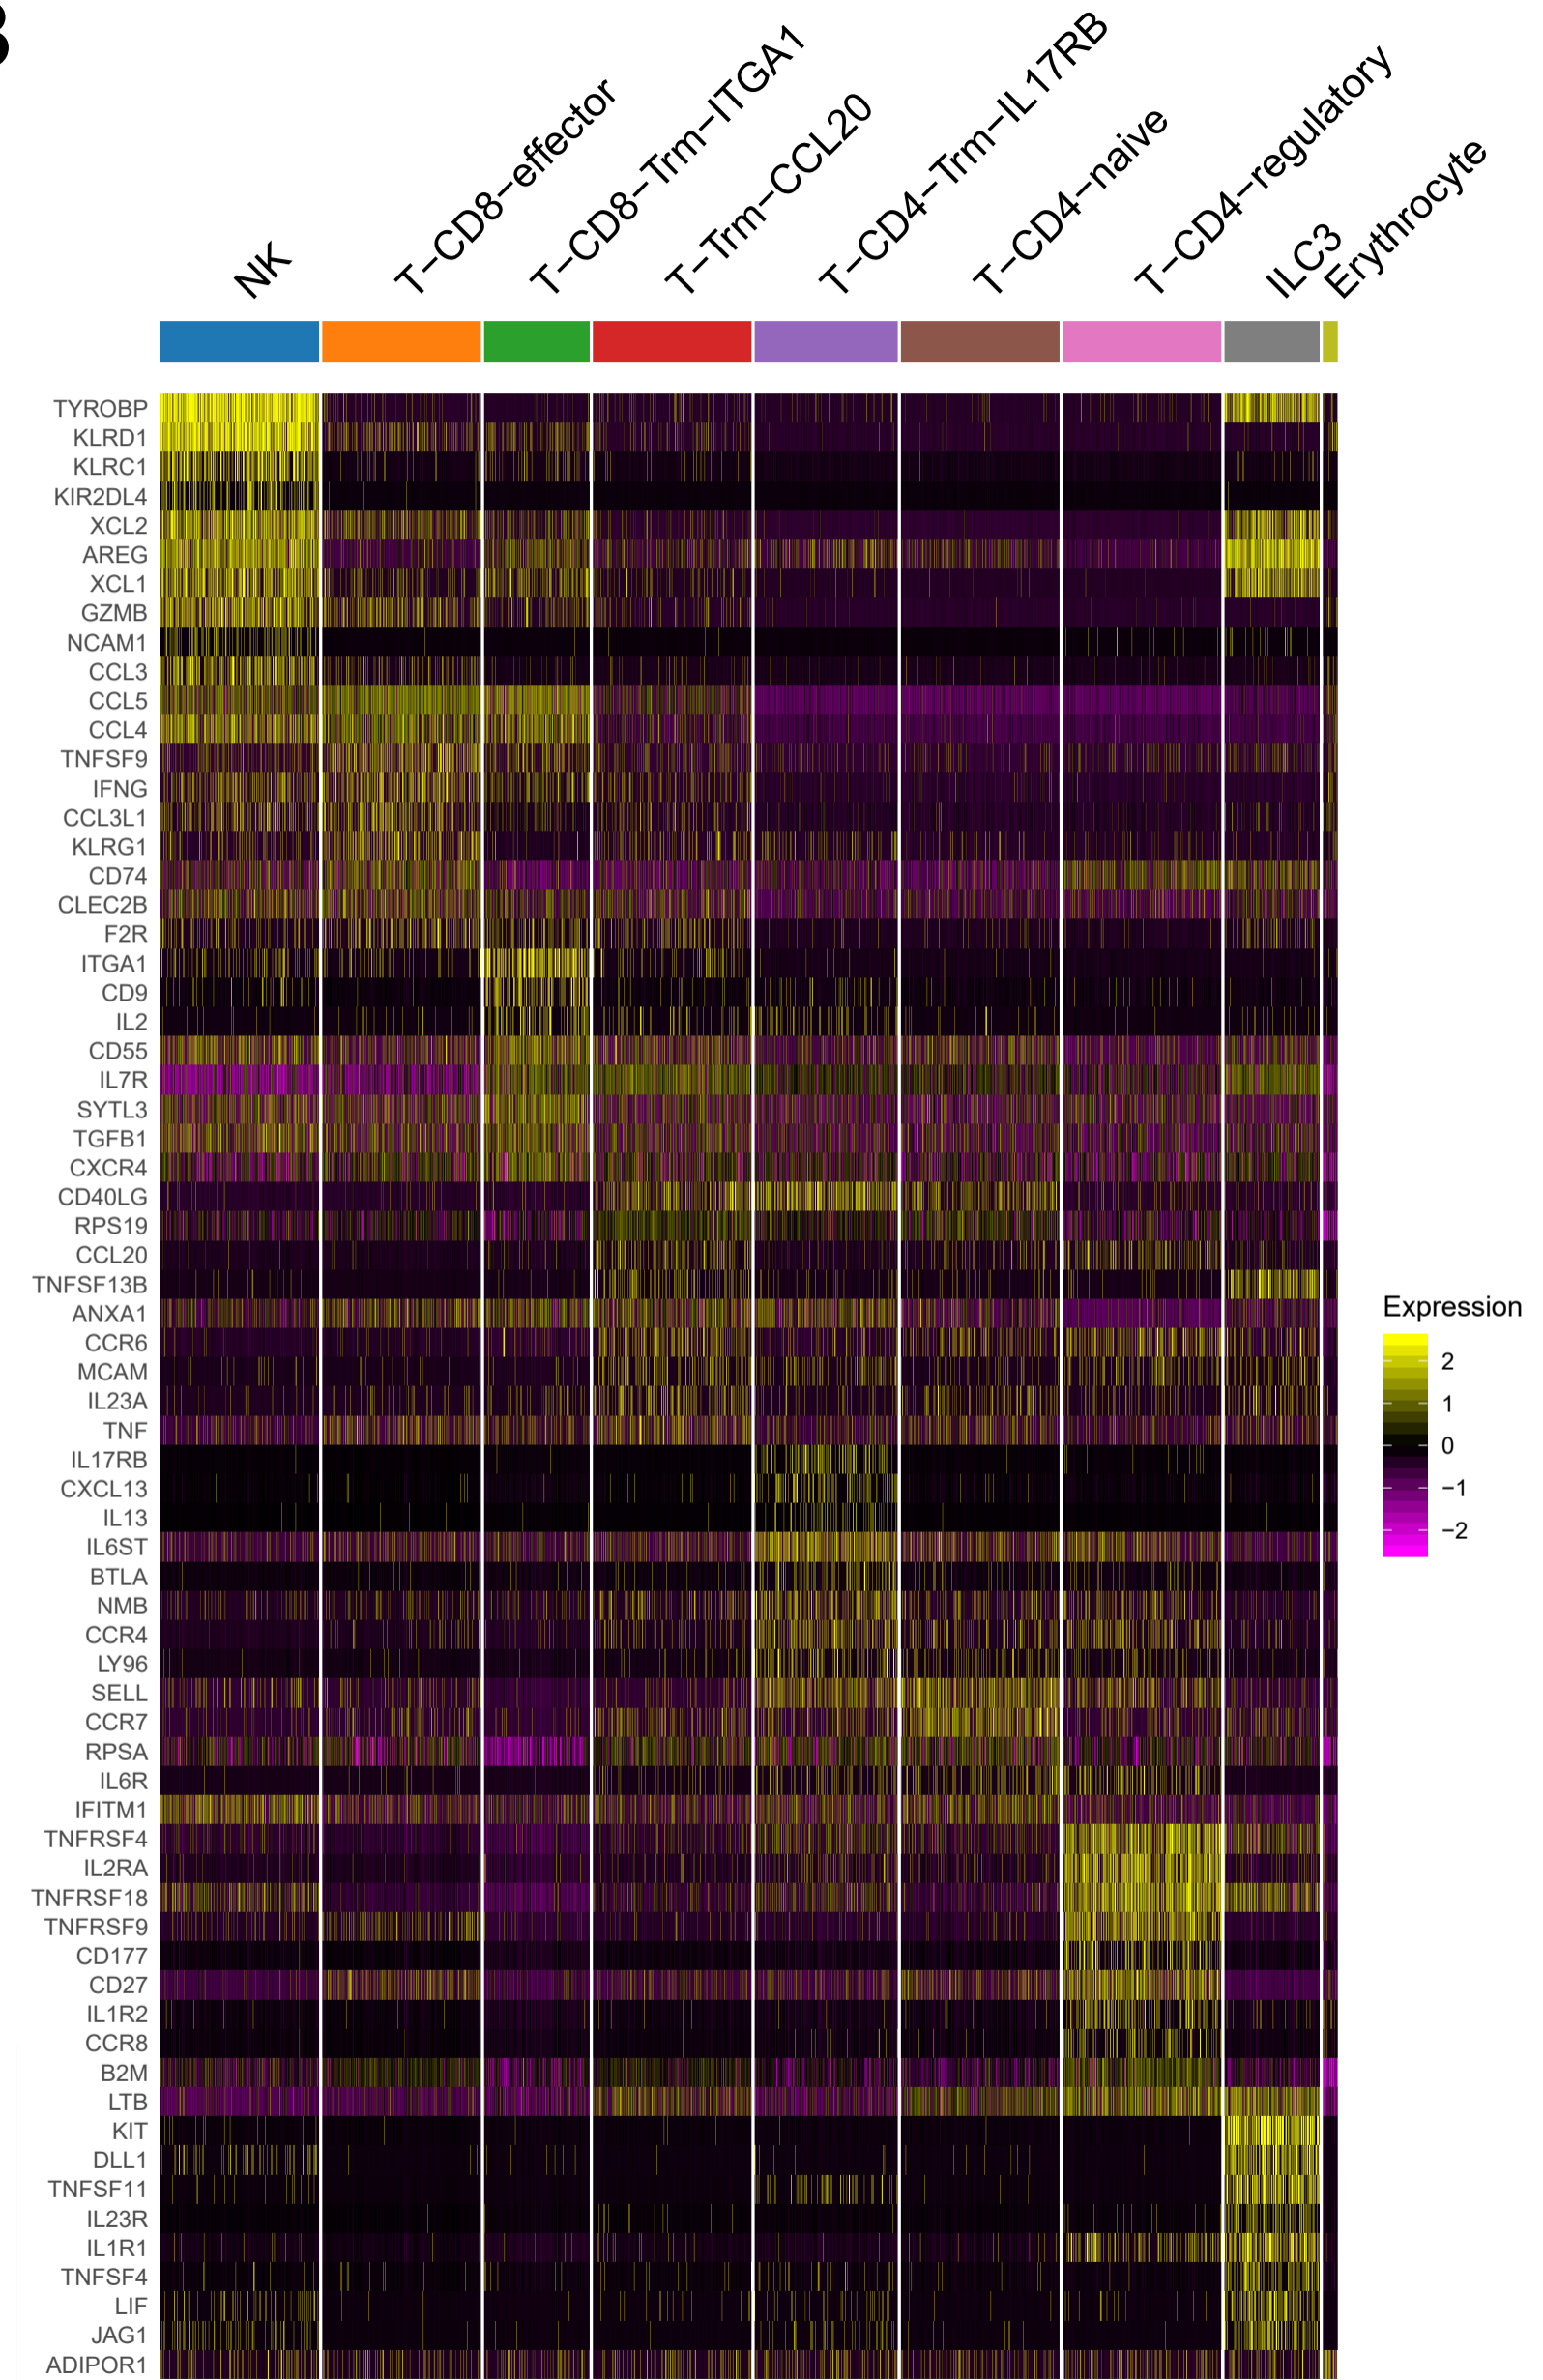

Supplement: NIHMS1683912-supplement-12.pdf [file NIHMS1683912-supplement-12.pdf]

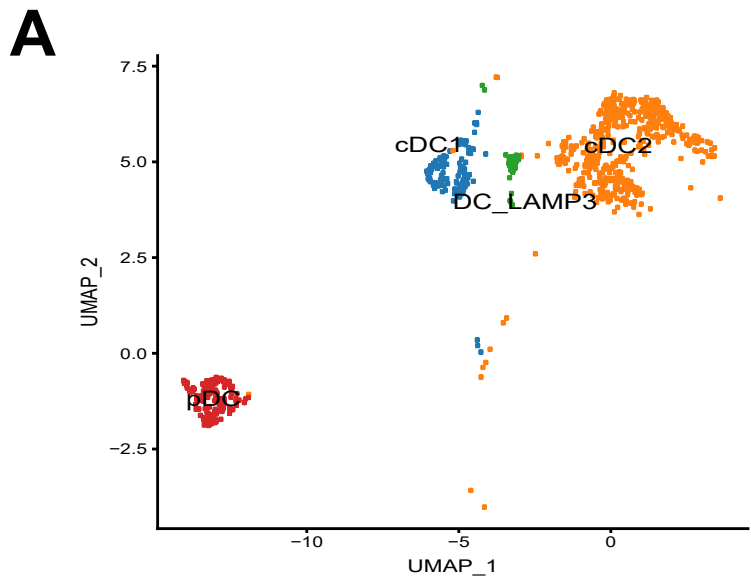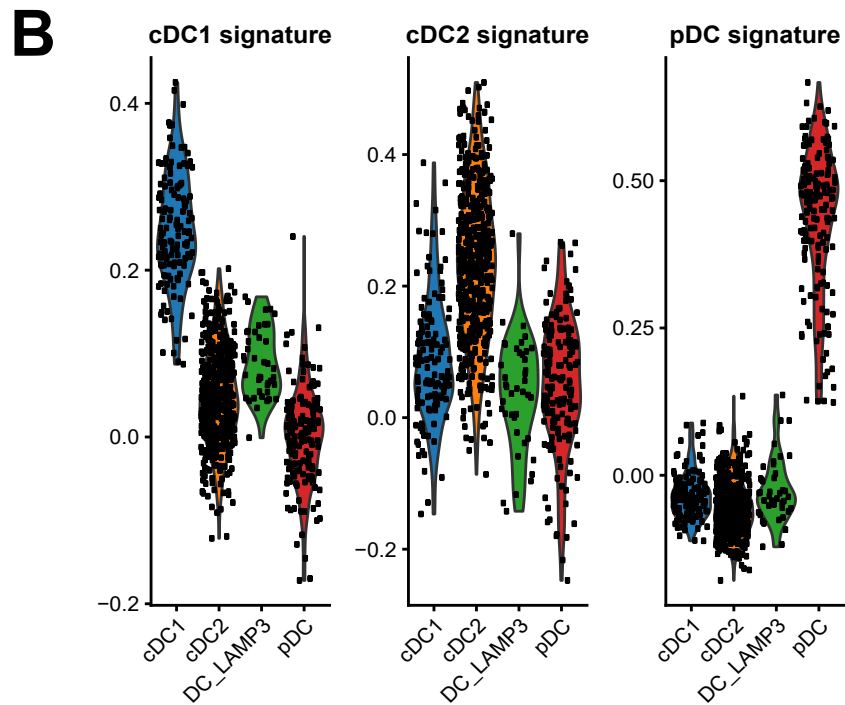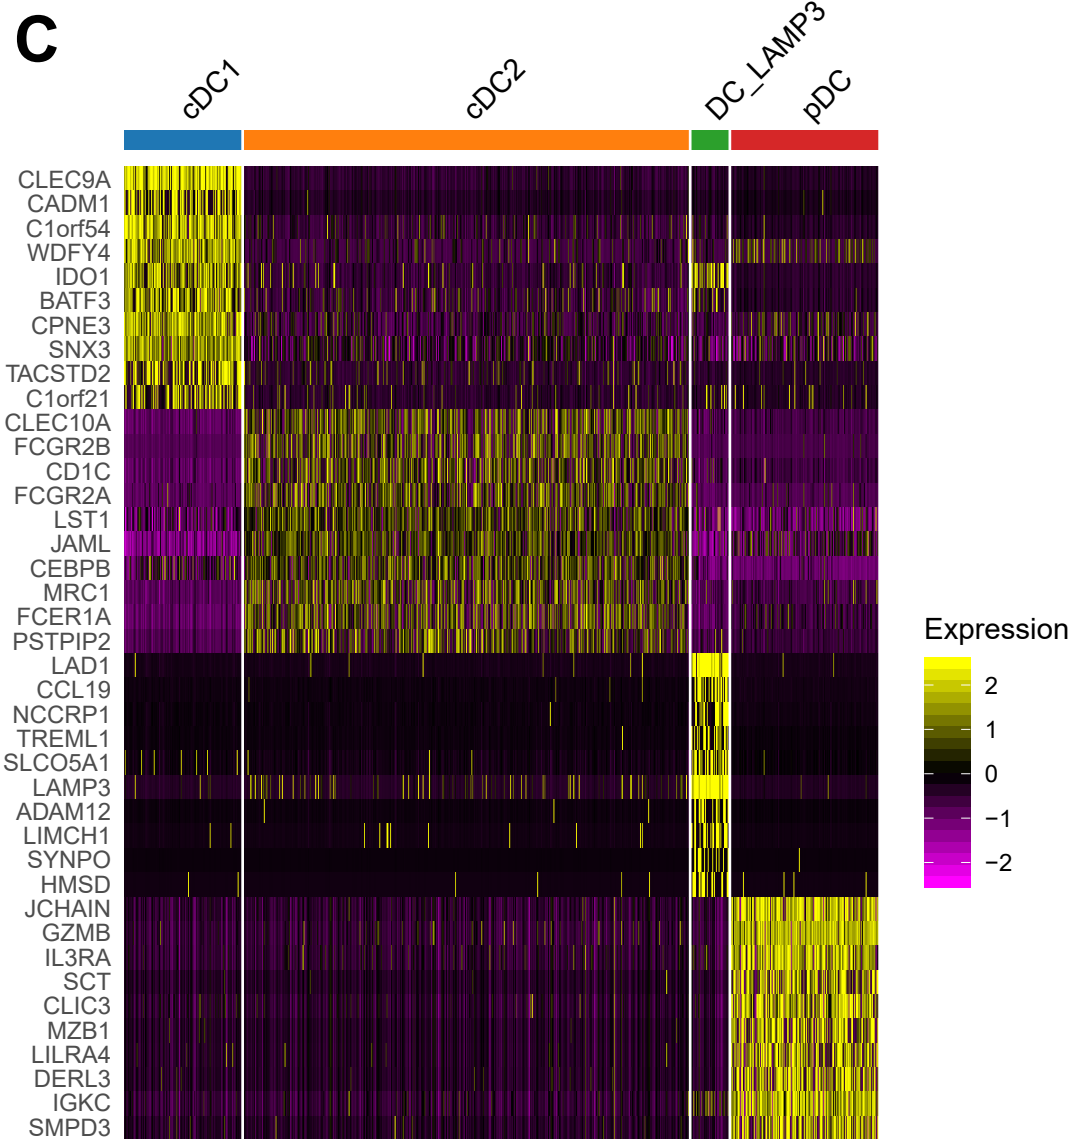

Supplement: NIHMS1683912-supplement-13.pdf [file NIHMS1683912-supplement-13.pdf]

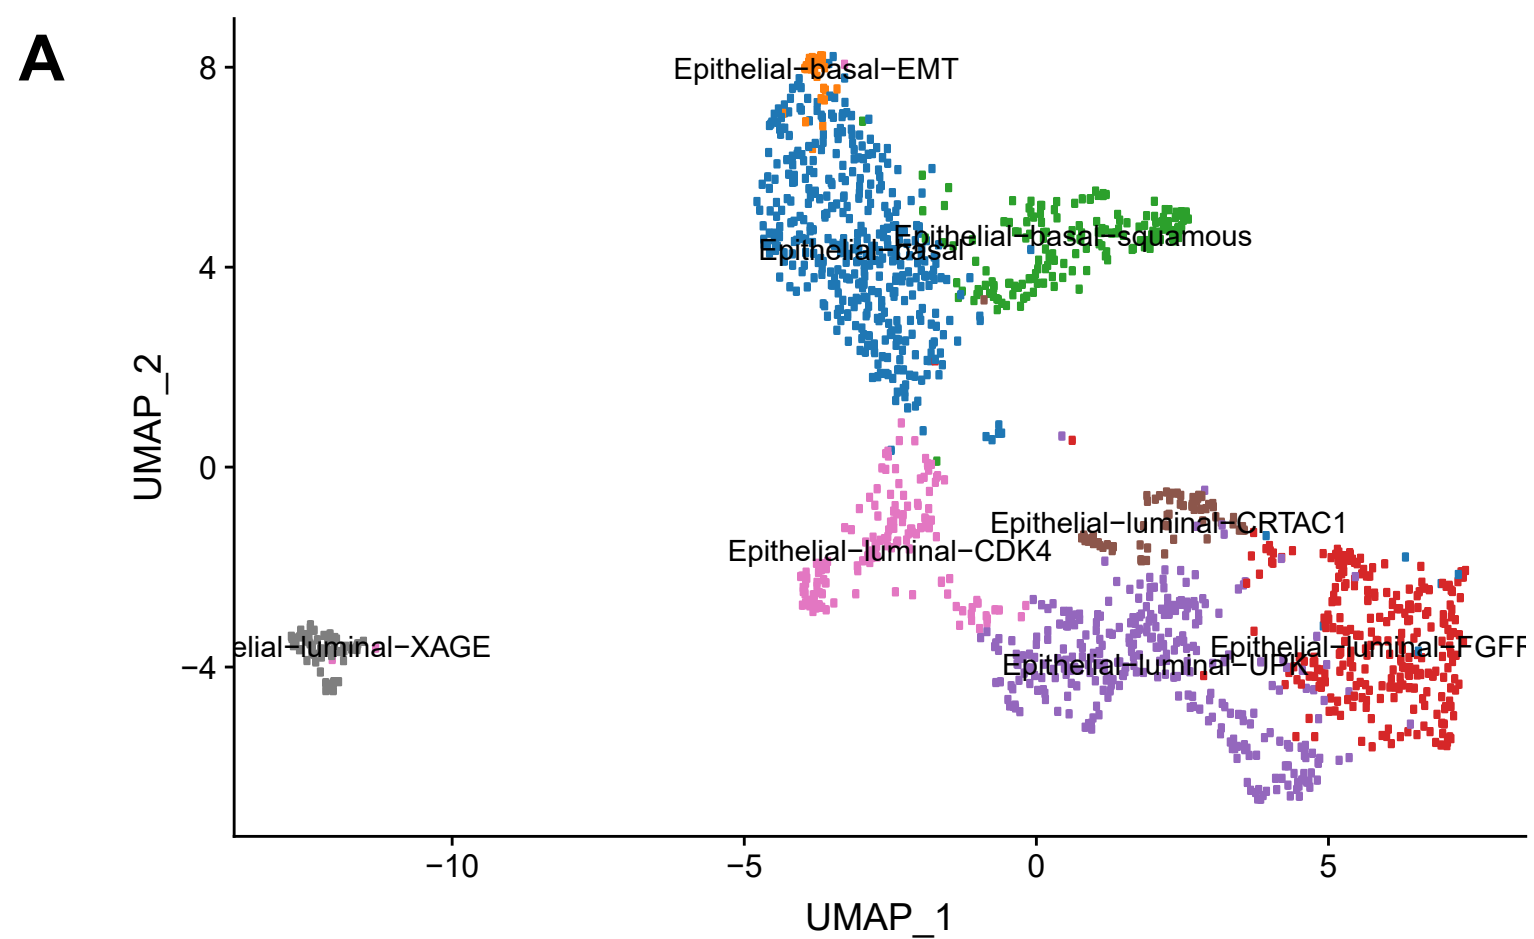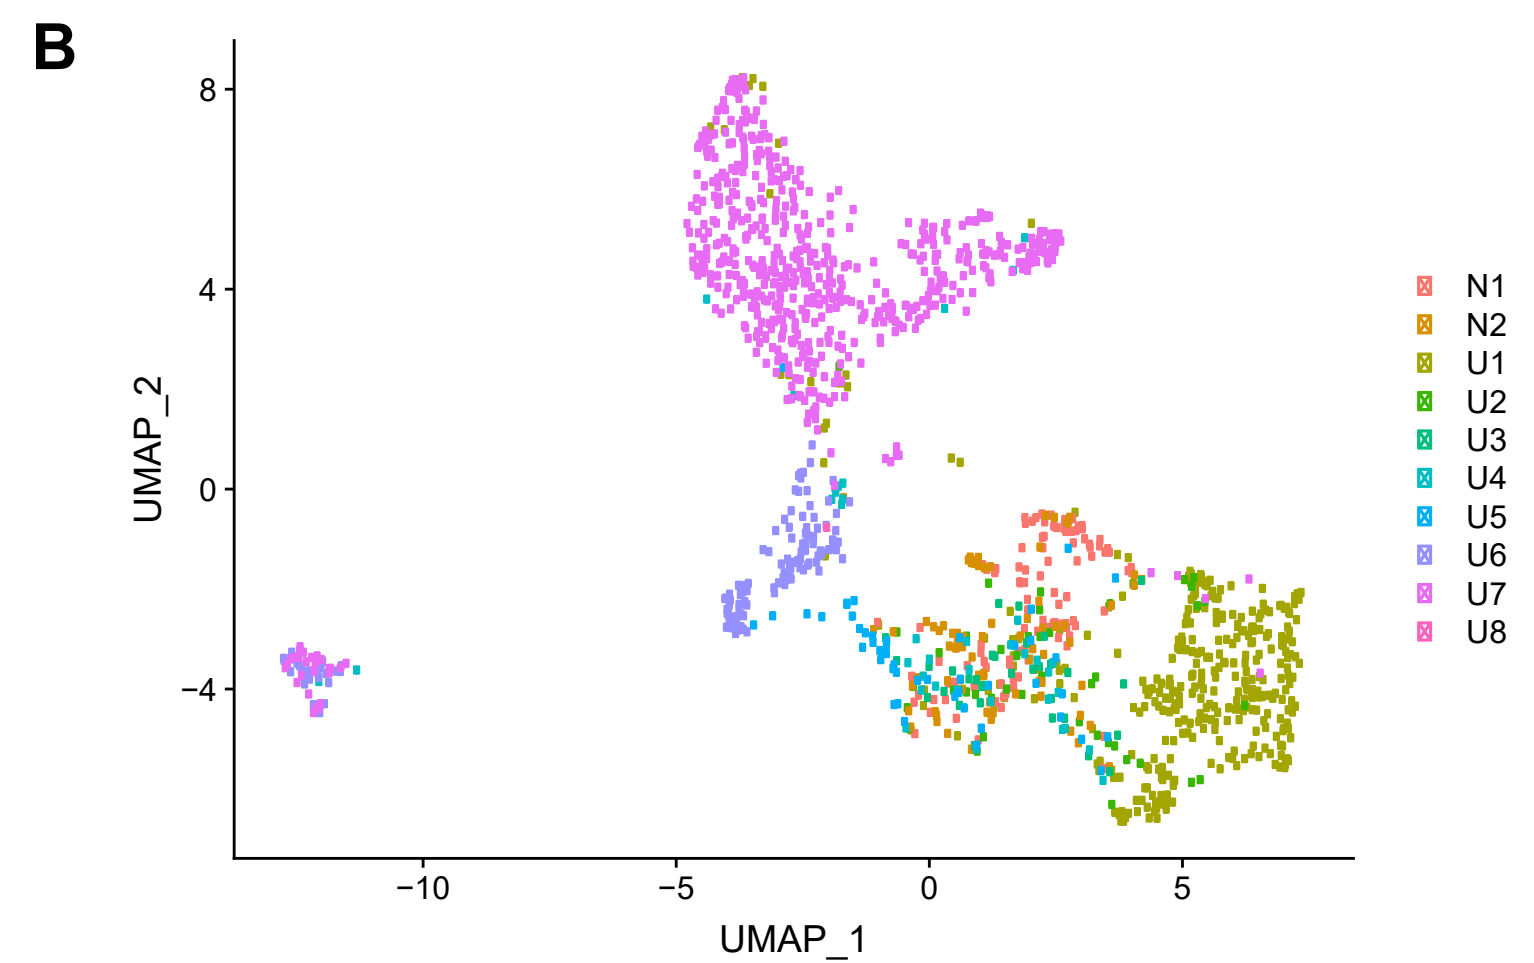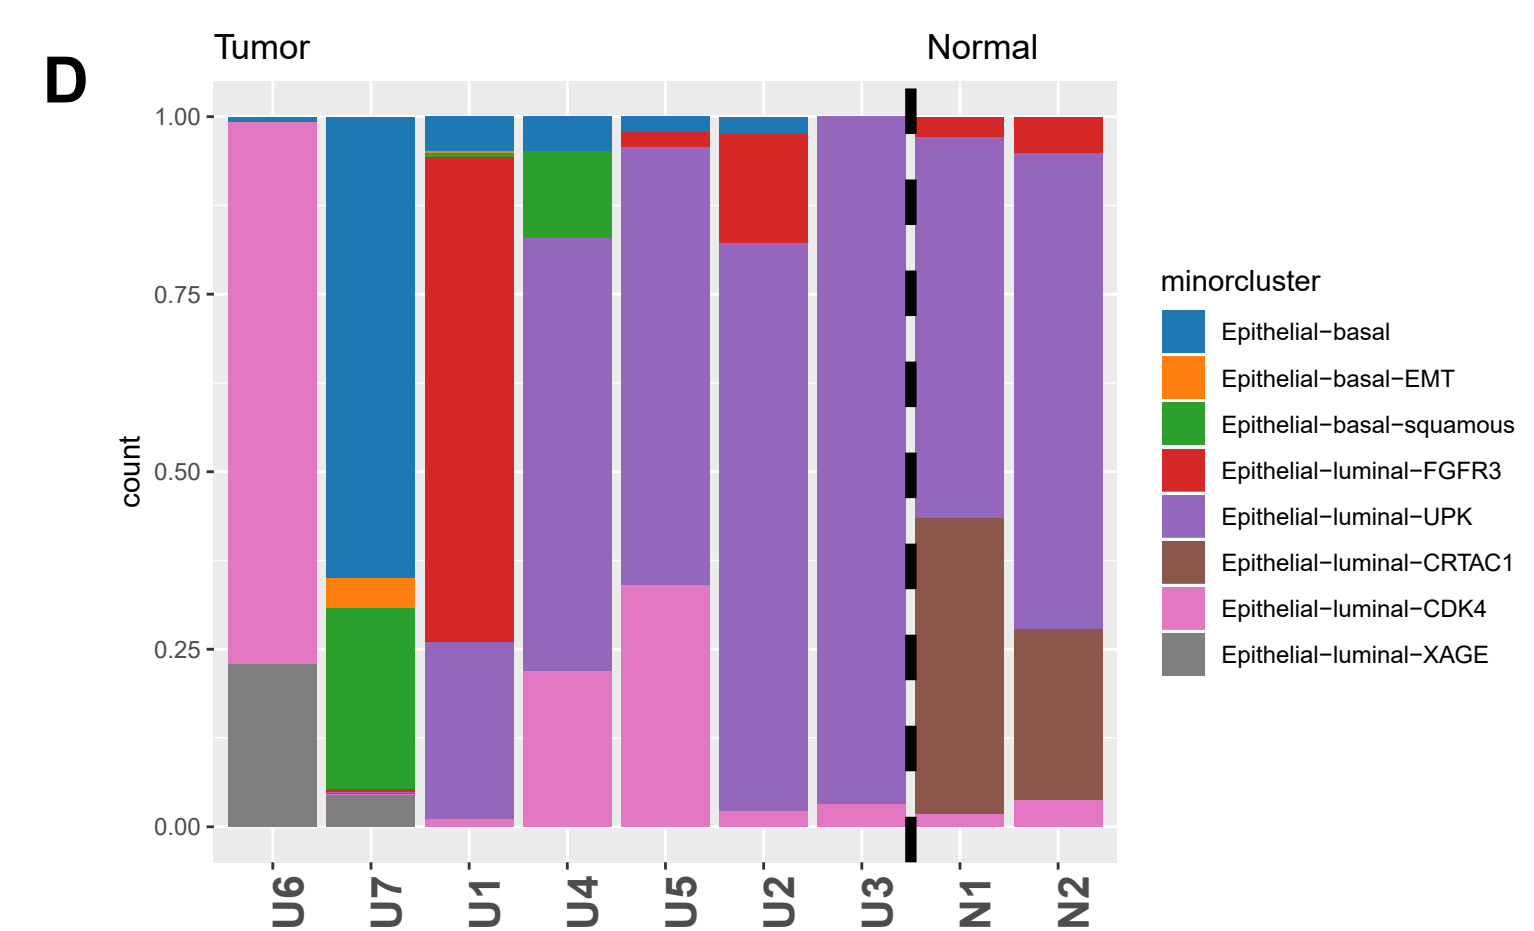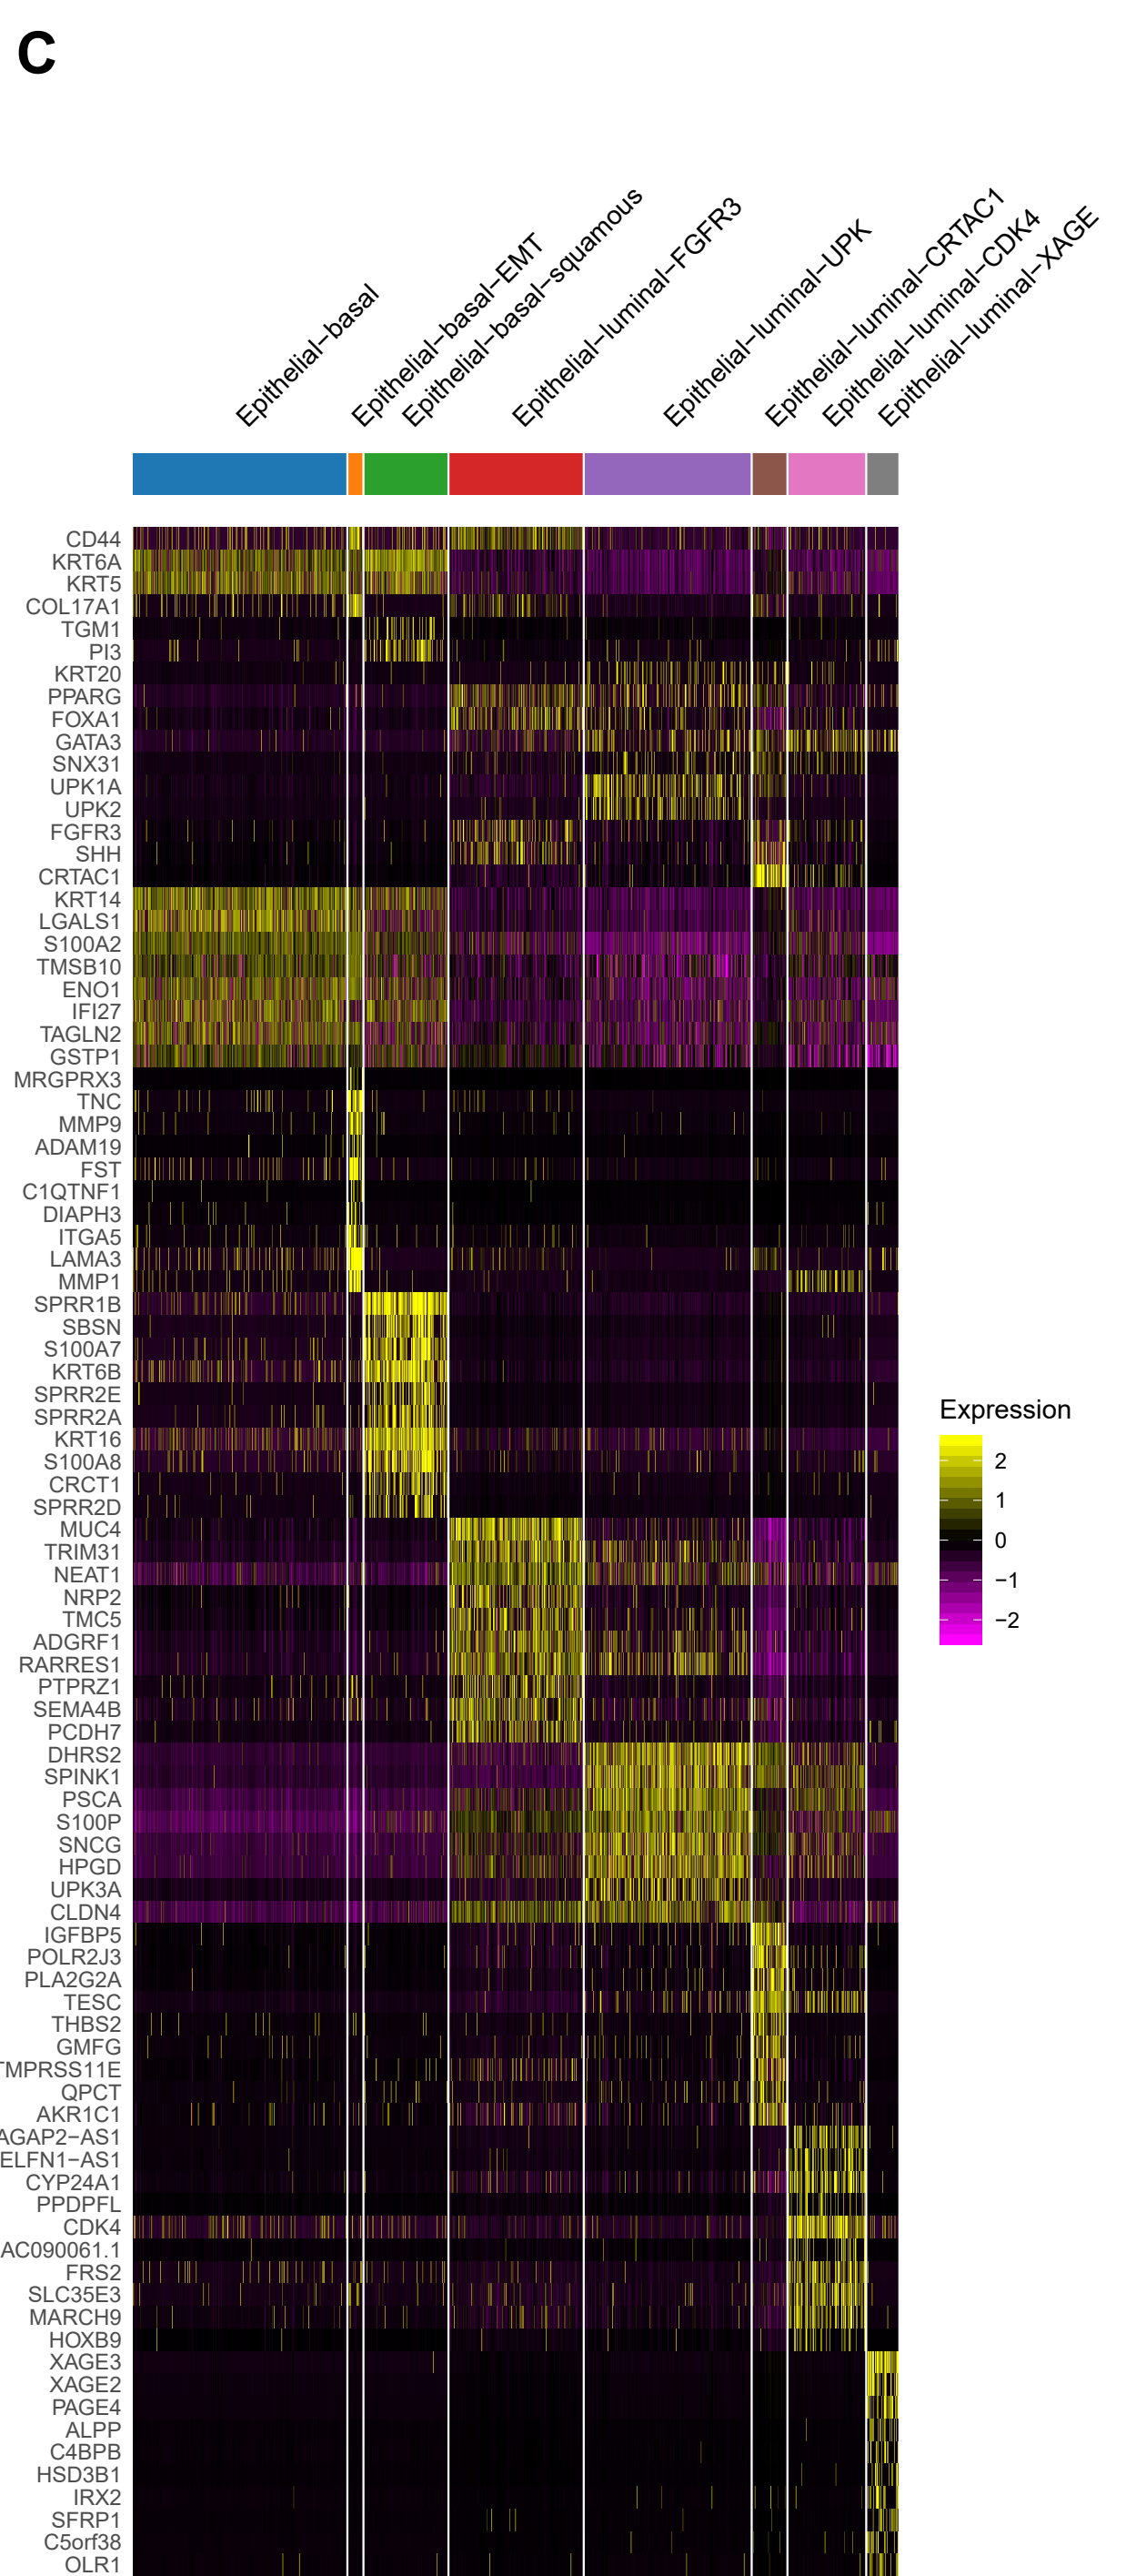

Supplement: NIHMS1683912-supplement-14.pdf [file NIHMS1683912-supplement-14.pdf]

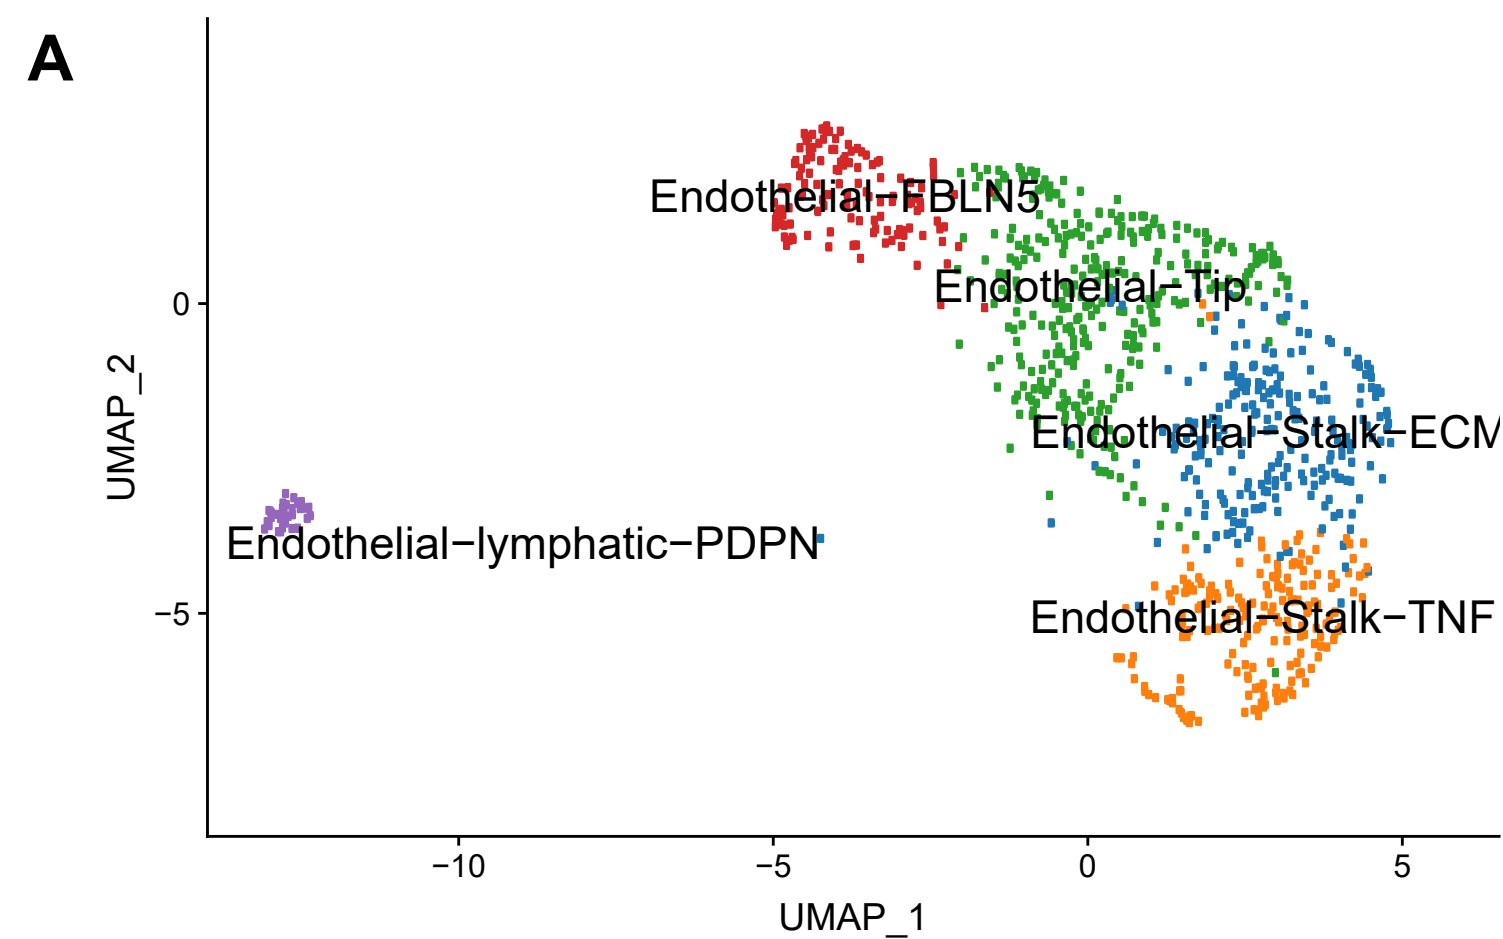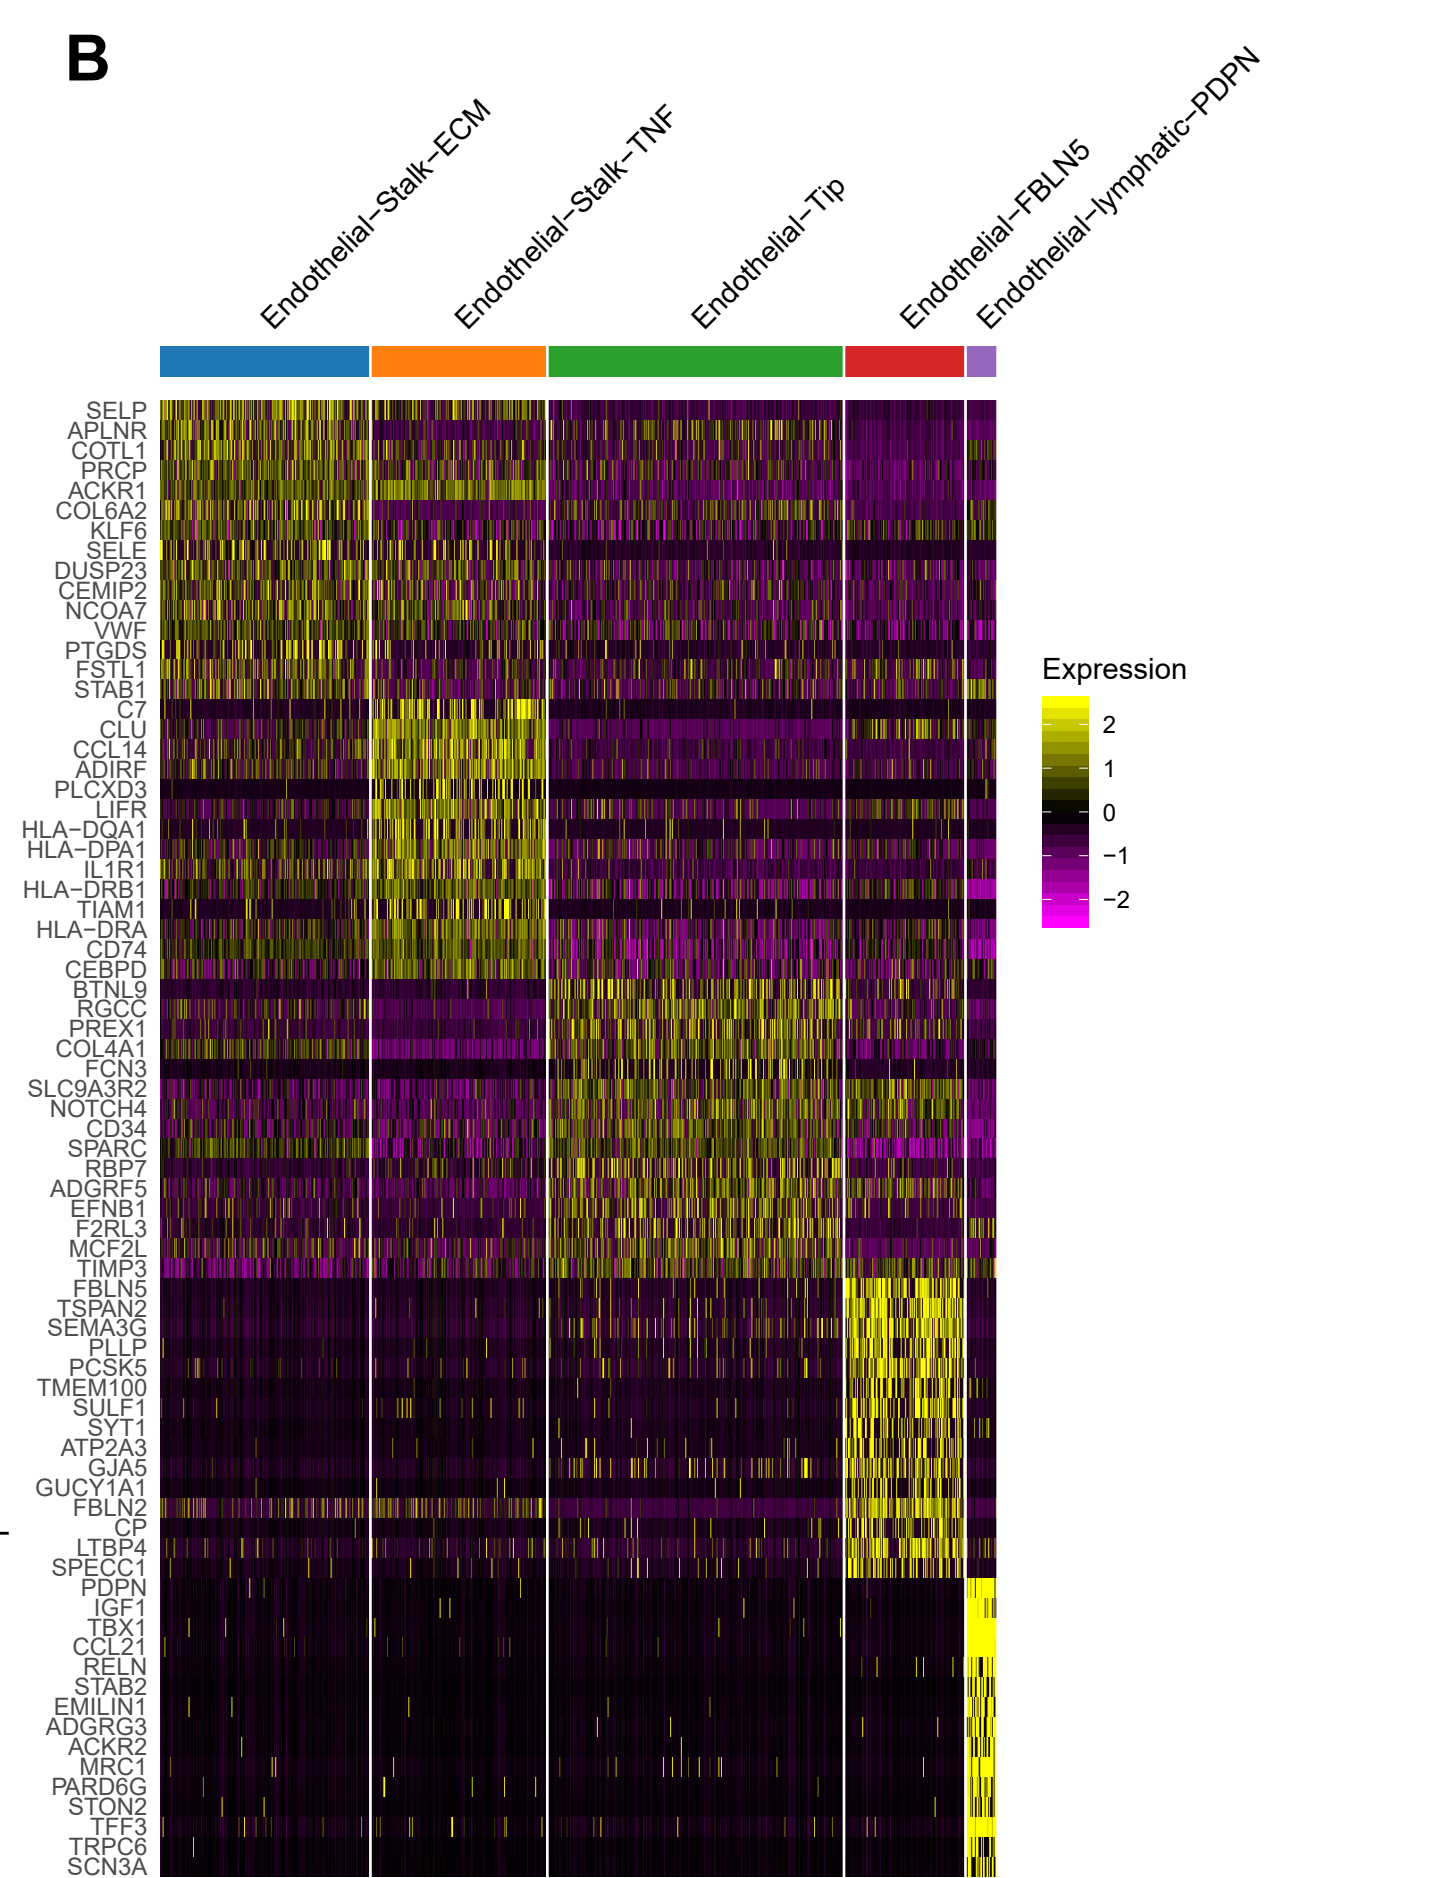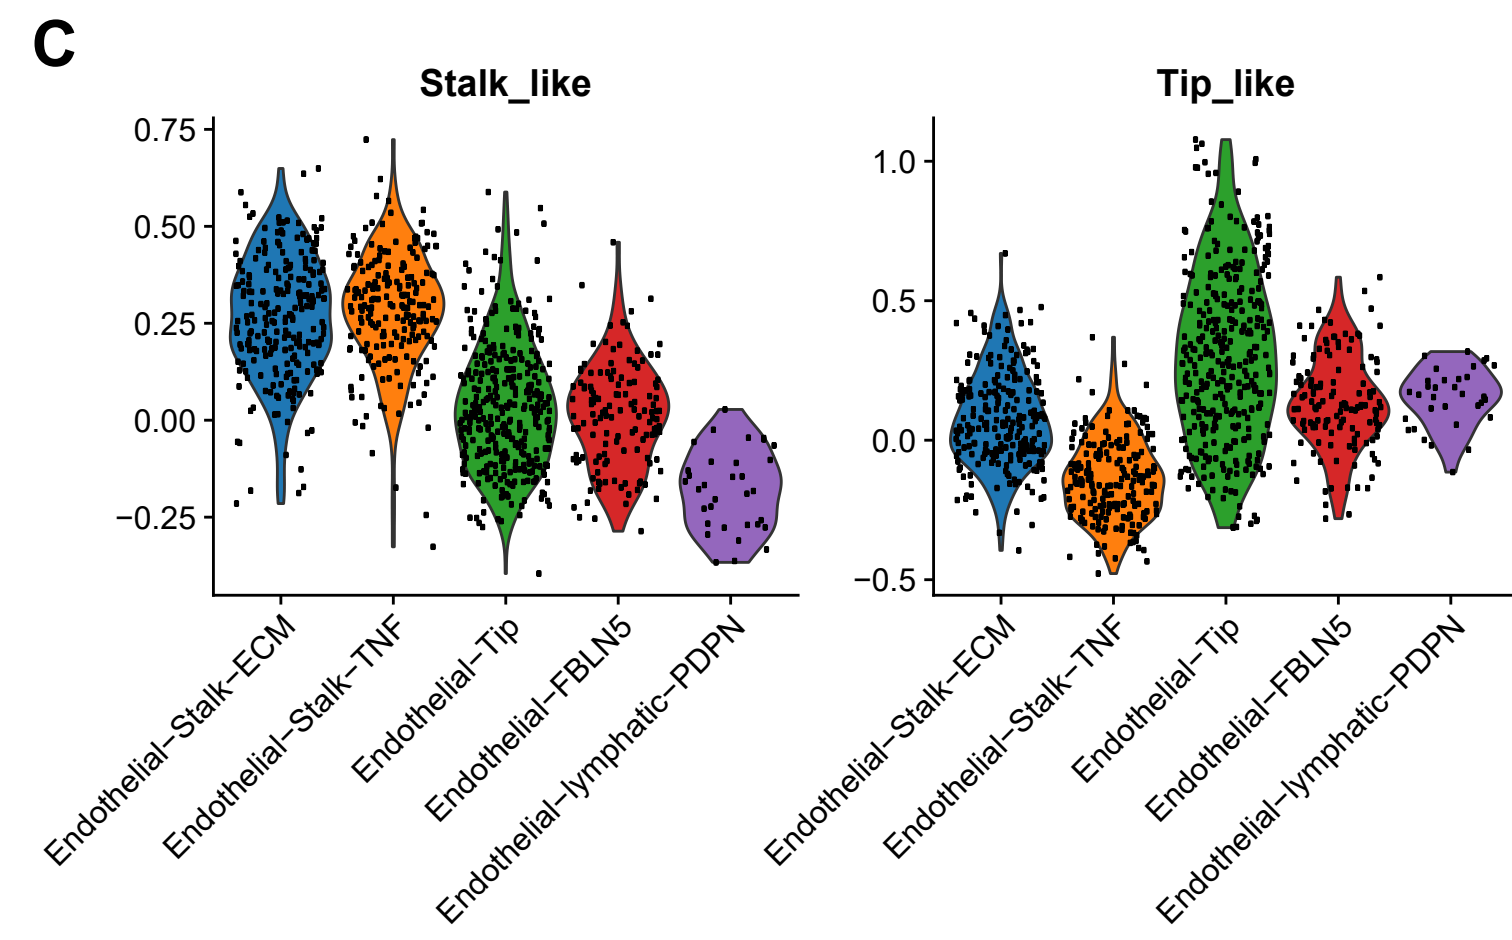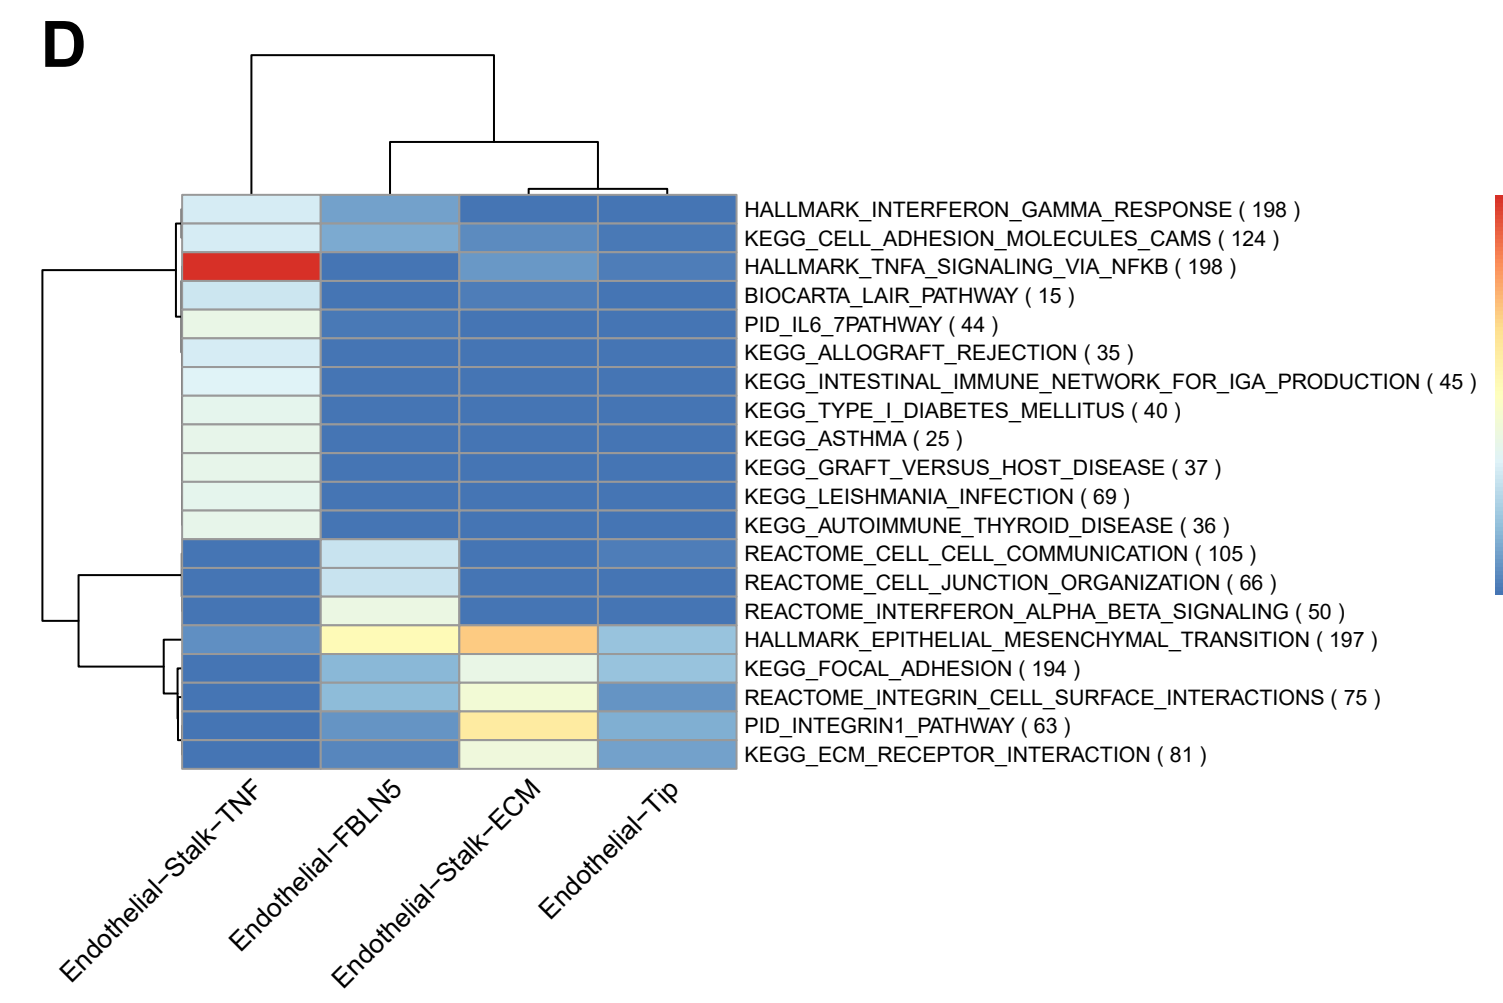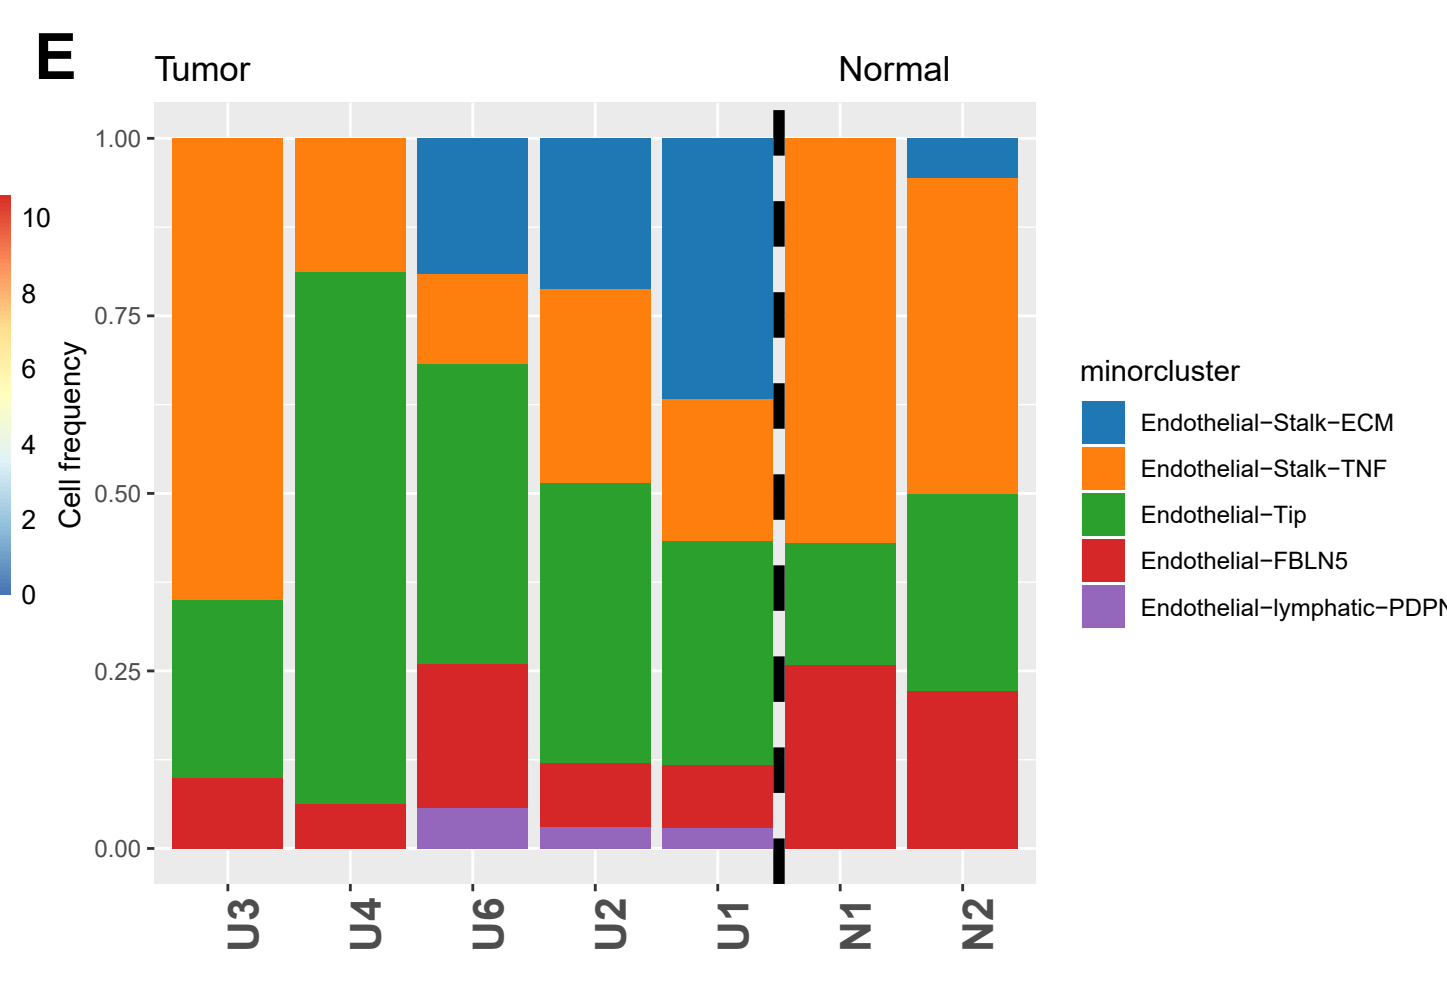

Supplement: NIHMS1683912-supplement-15.pdf [file NIHMS1683912-supplement-15.pdf]

**A**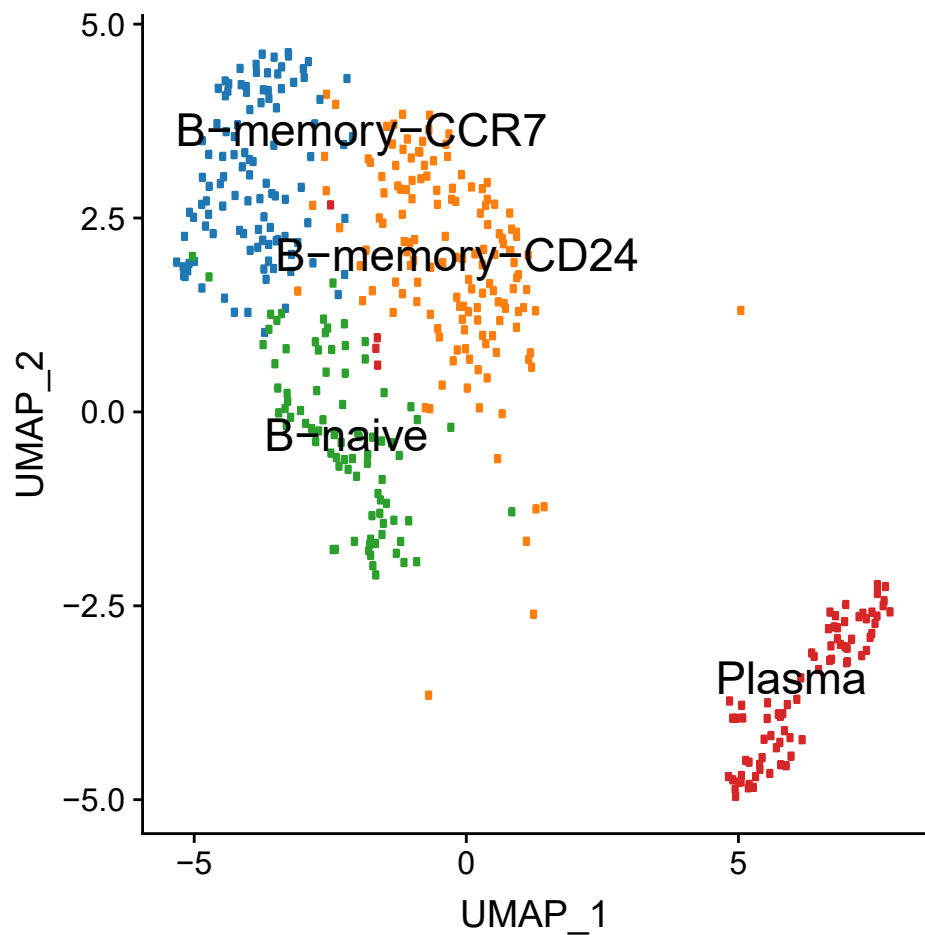**B**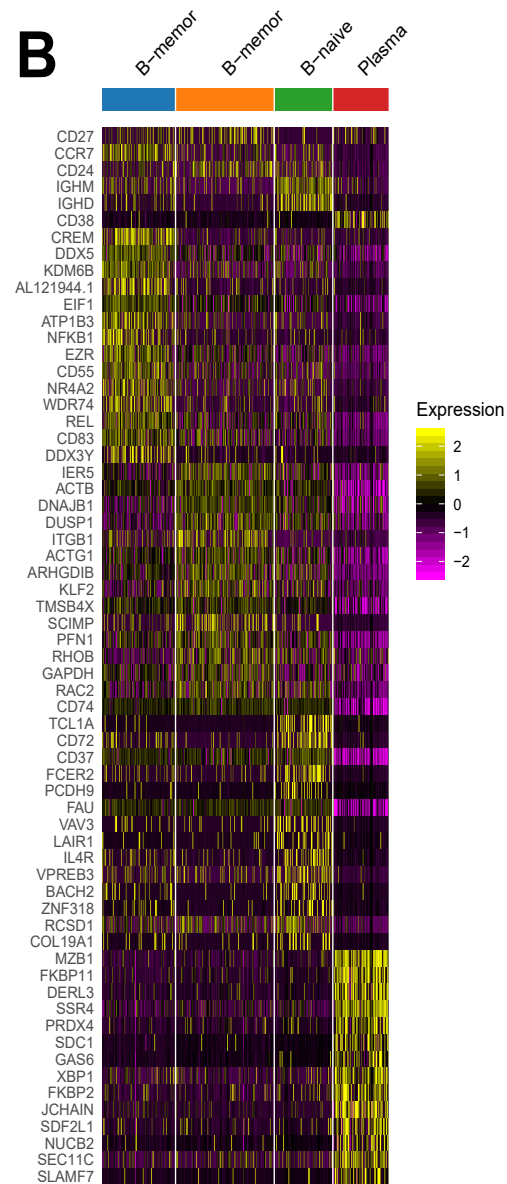

Supplement: NIHMS1683912-supplement-16.pdf [file NIHMS1683912-supplement-16.pdf]

A

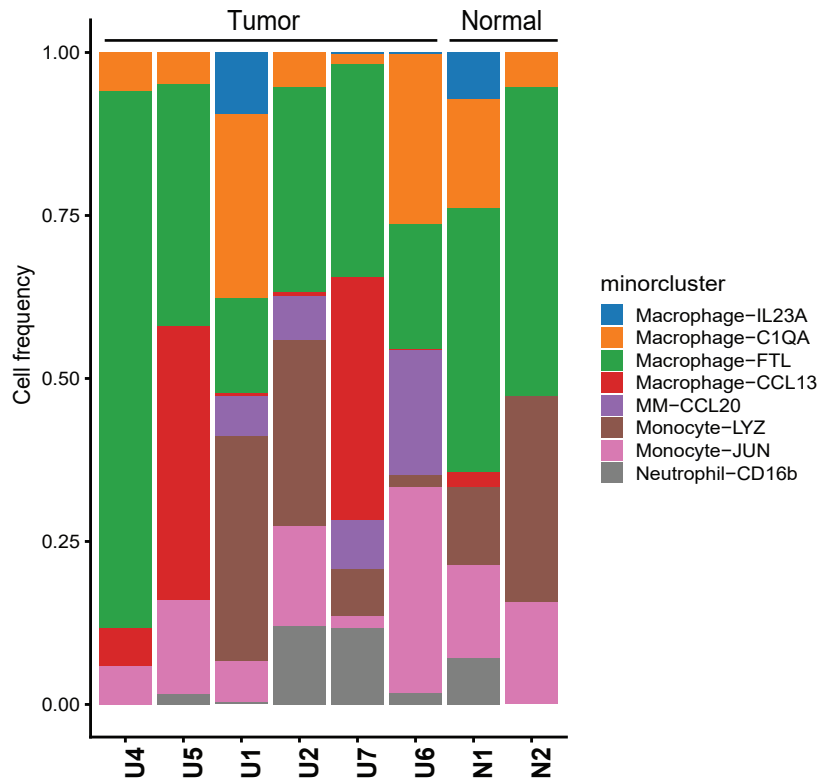

B

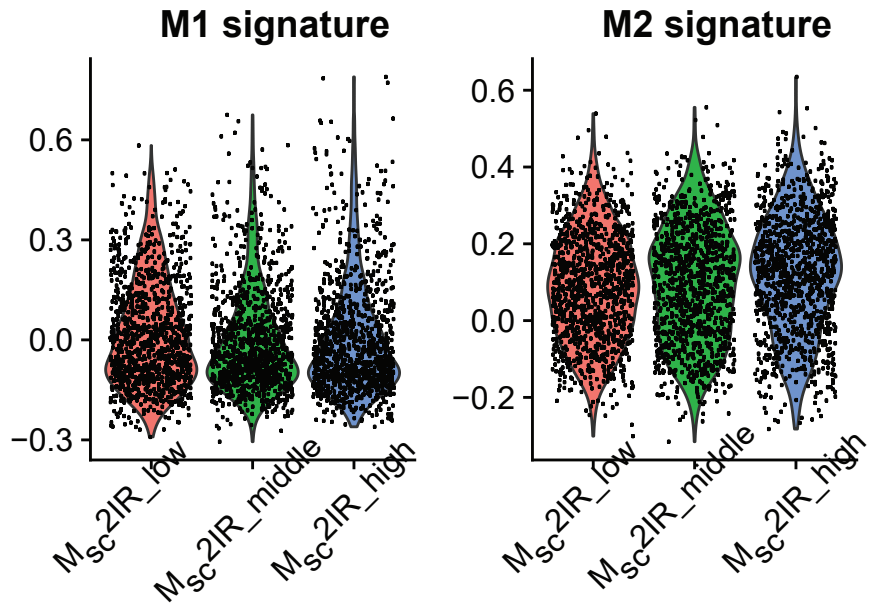

Supplement: NIHMS1683912-supplement-17.pdf [file NIHMS1683912-supplement-17.pdf]

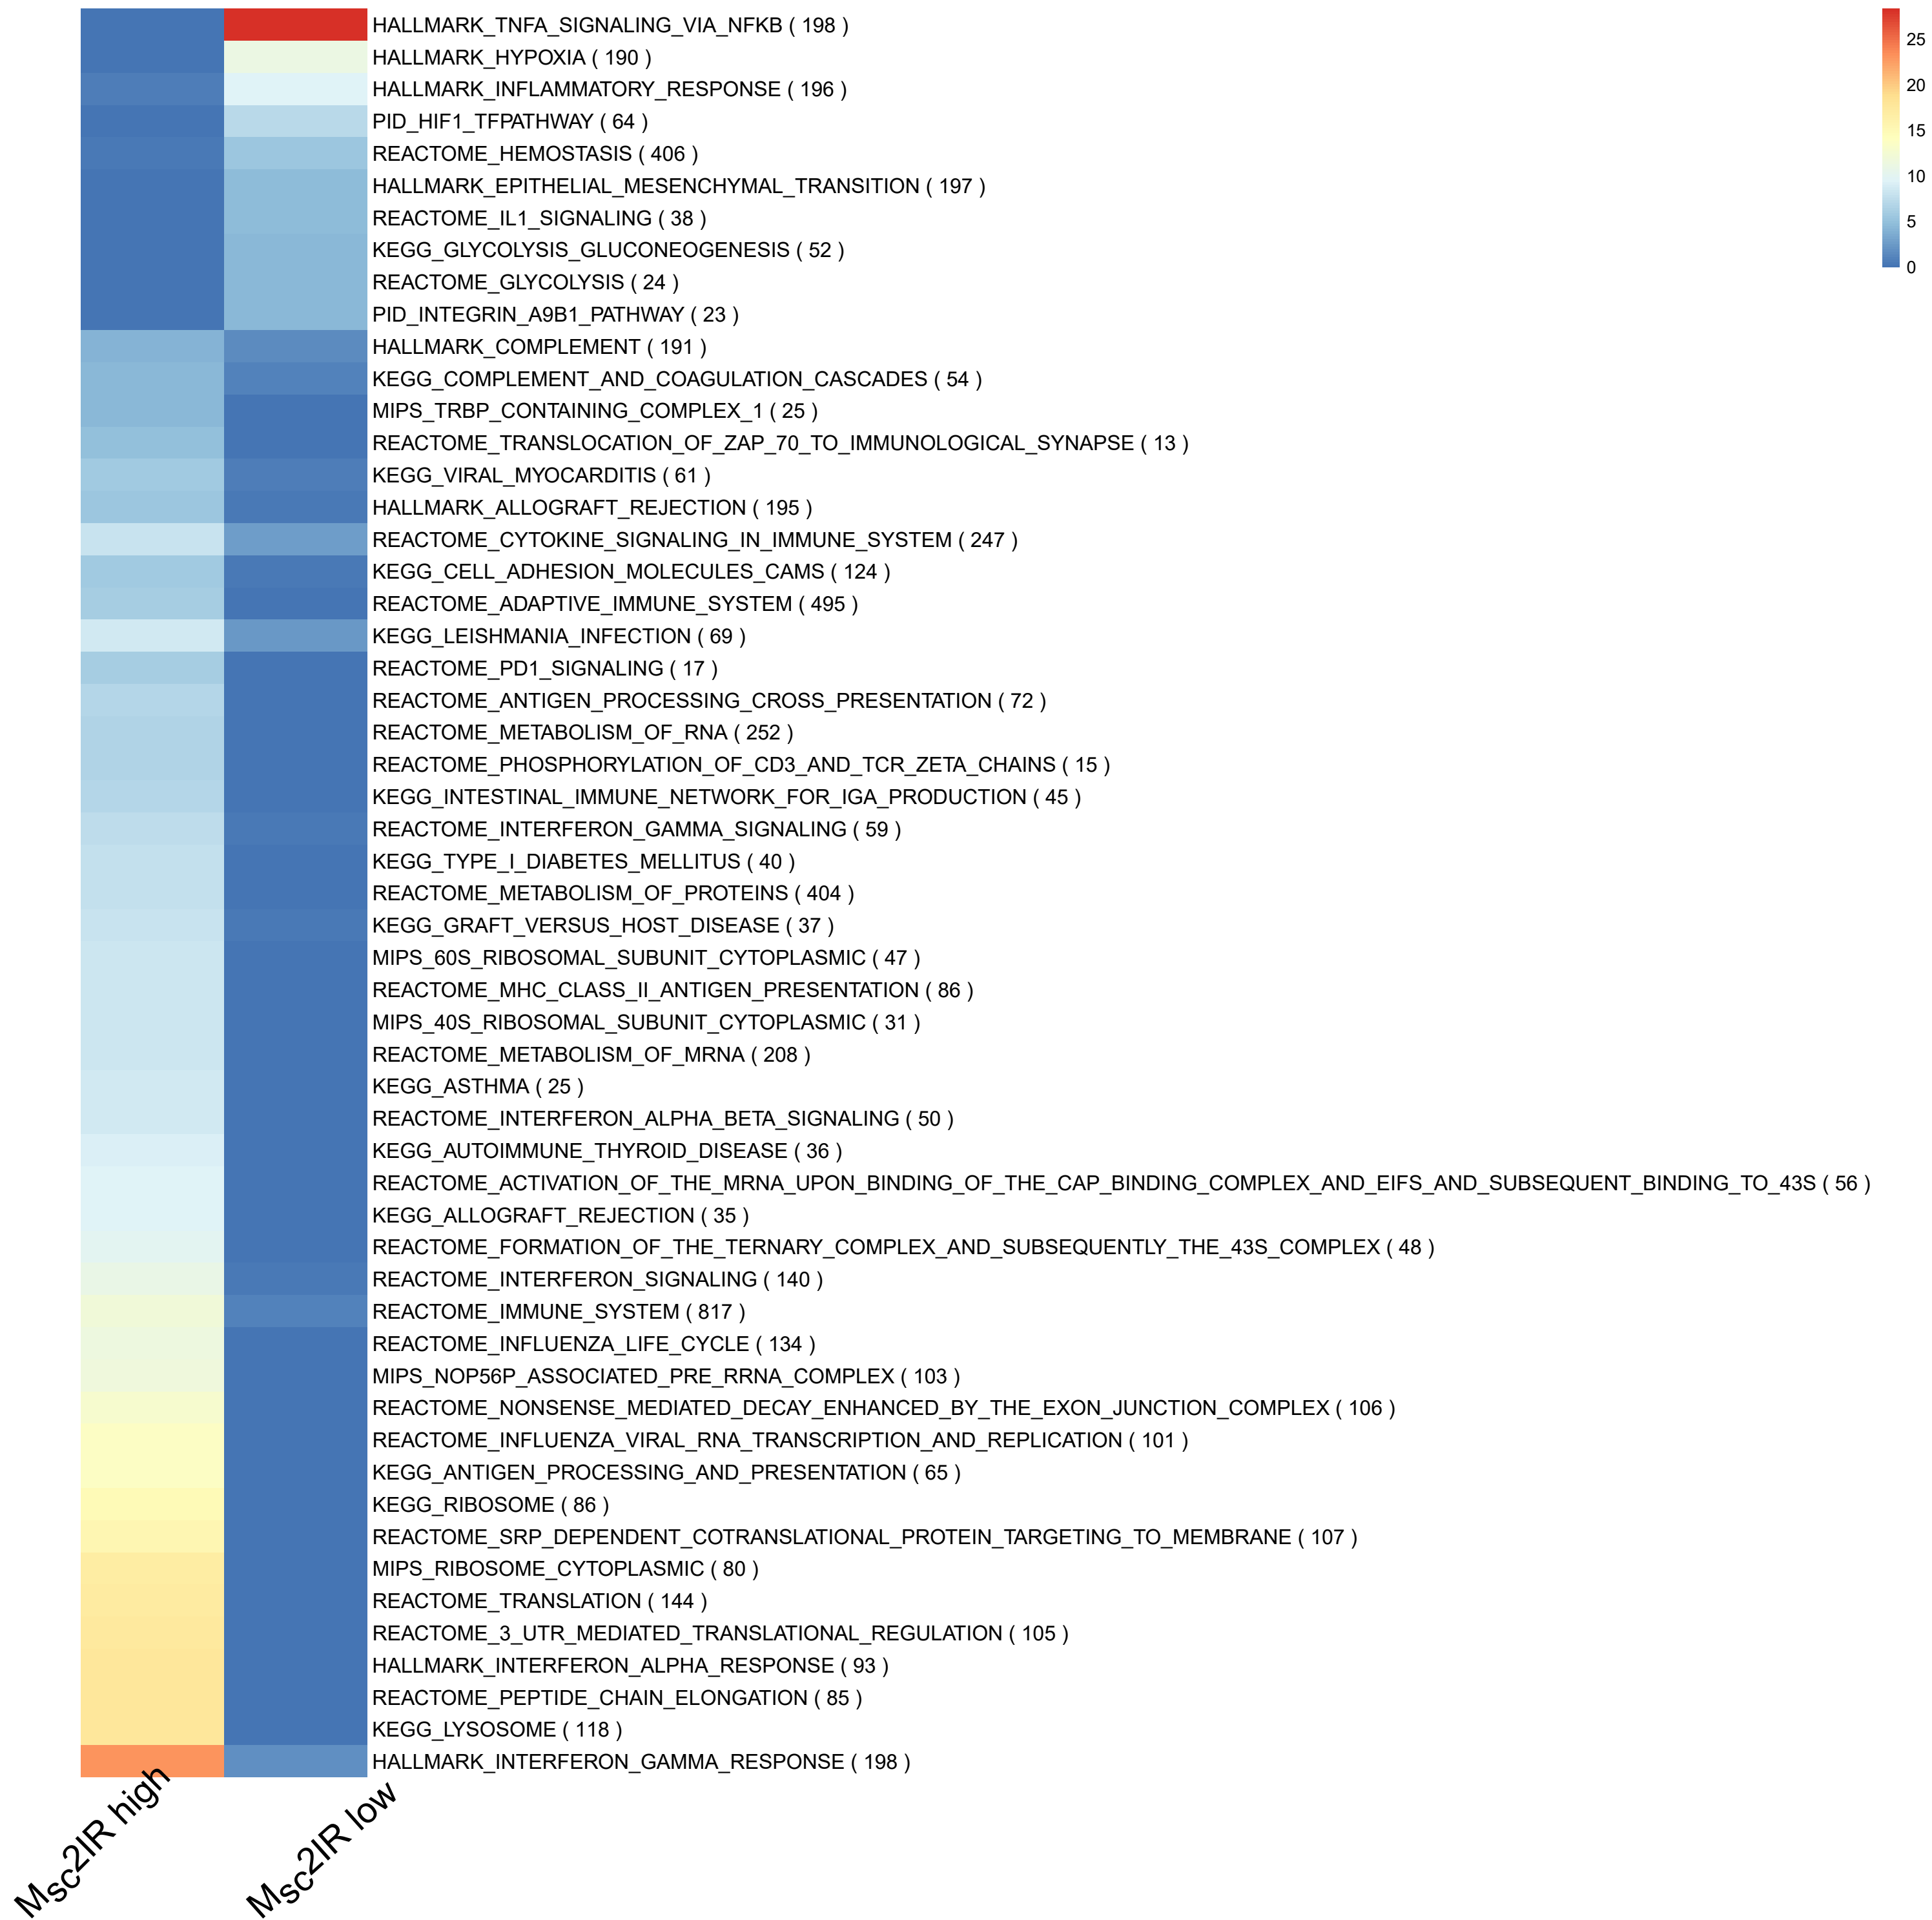

Supplement: NIHMS1683912-supplement-18.pdf [file NIHMS1683912-supplement-18.pdf]

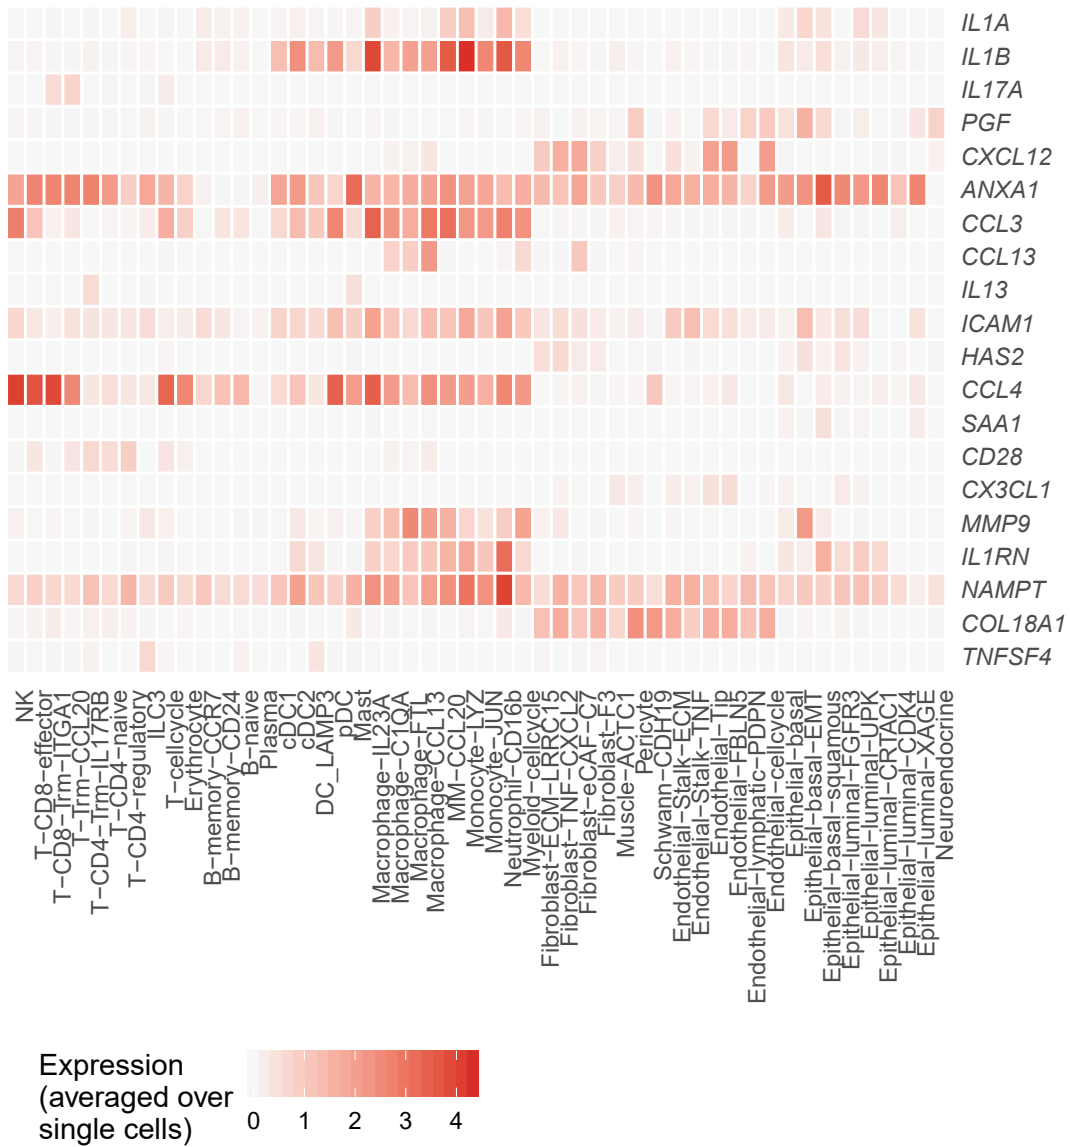

Supplement: NIHMS1683912-supplement-19.pdf [file NIHMS1683912-supplement-19.pdf]

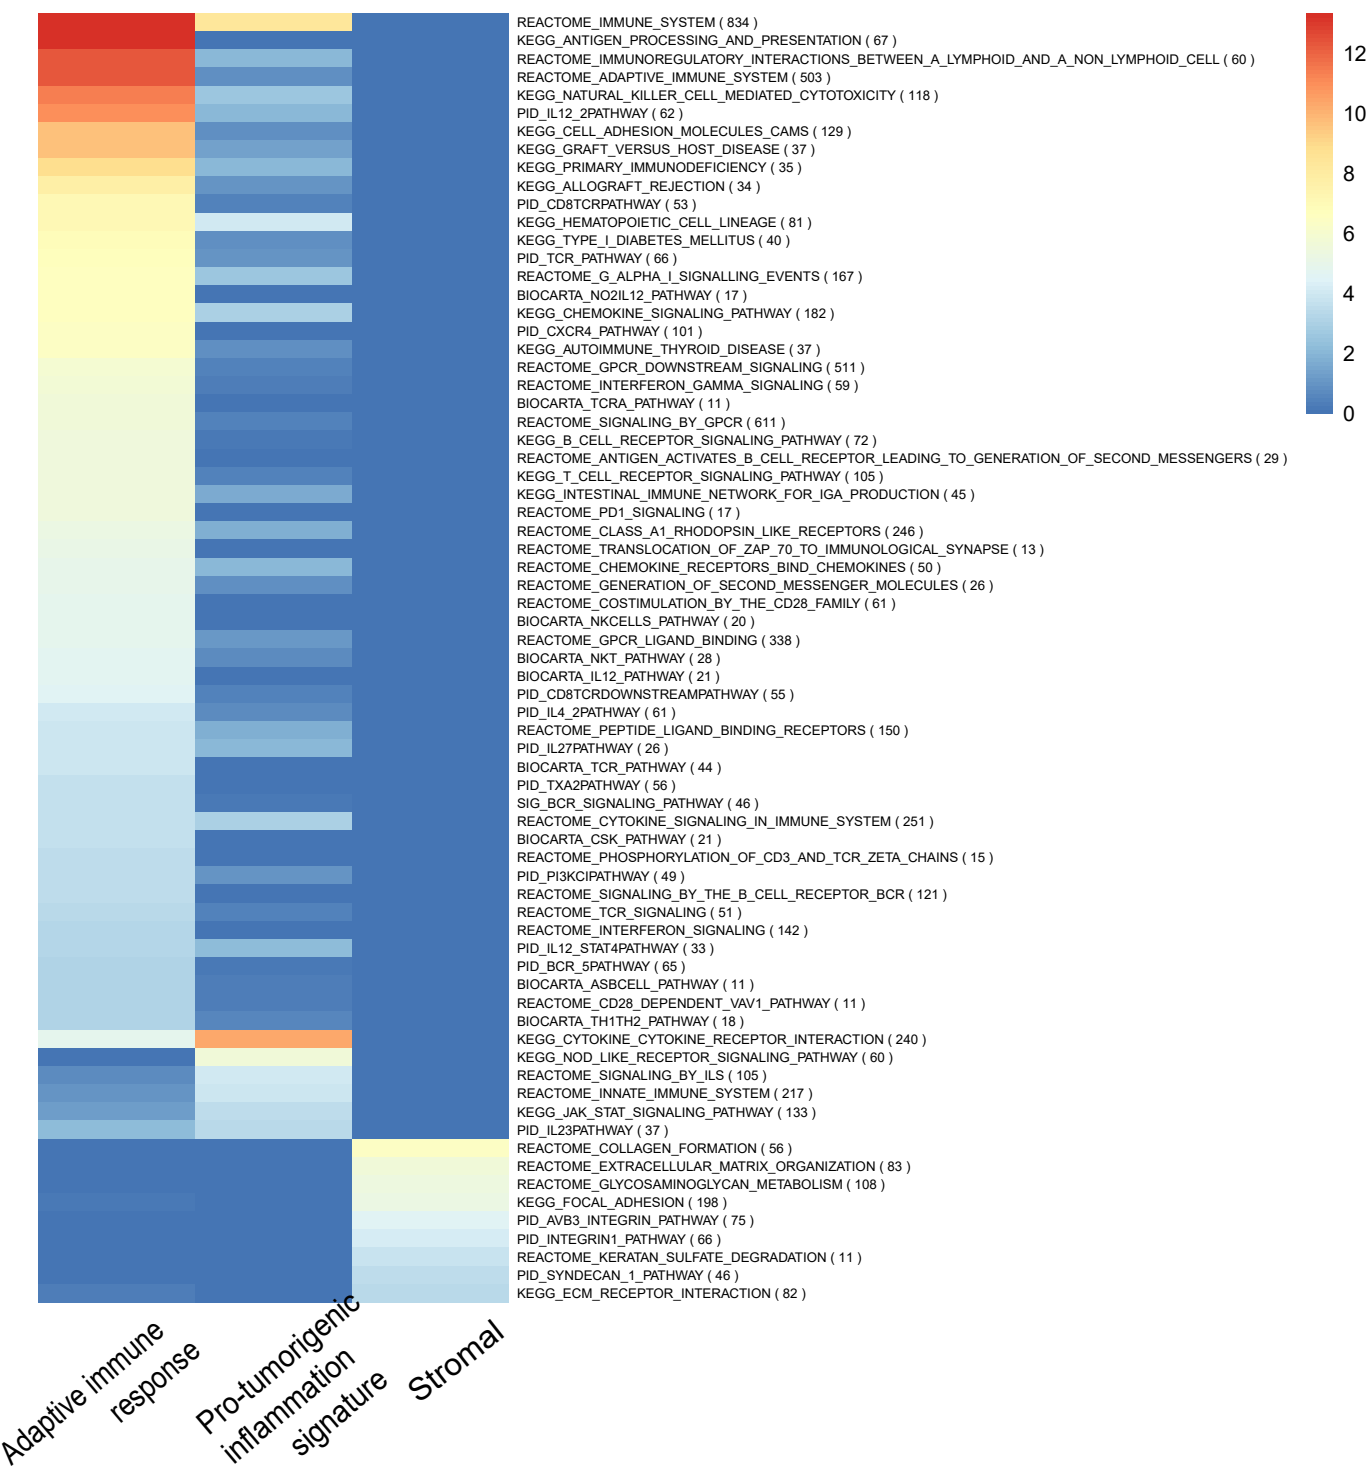

Supplement: NIHMS1683912-supplement-2.pdf [file NIHMS1683912-supplement-2.pdf]

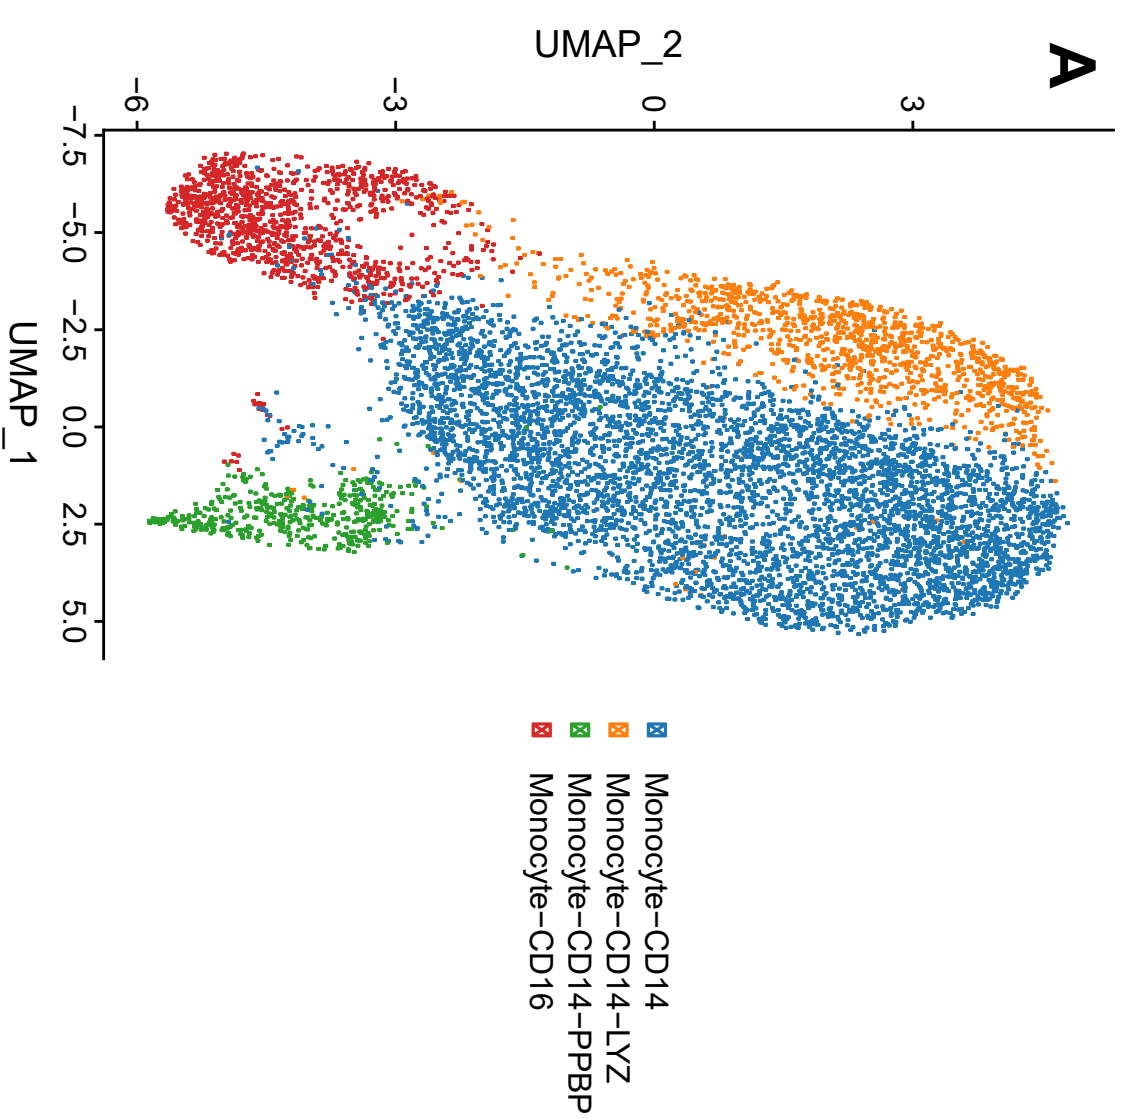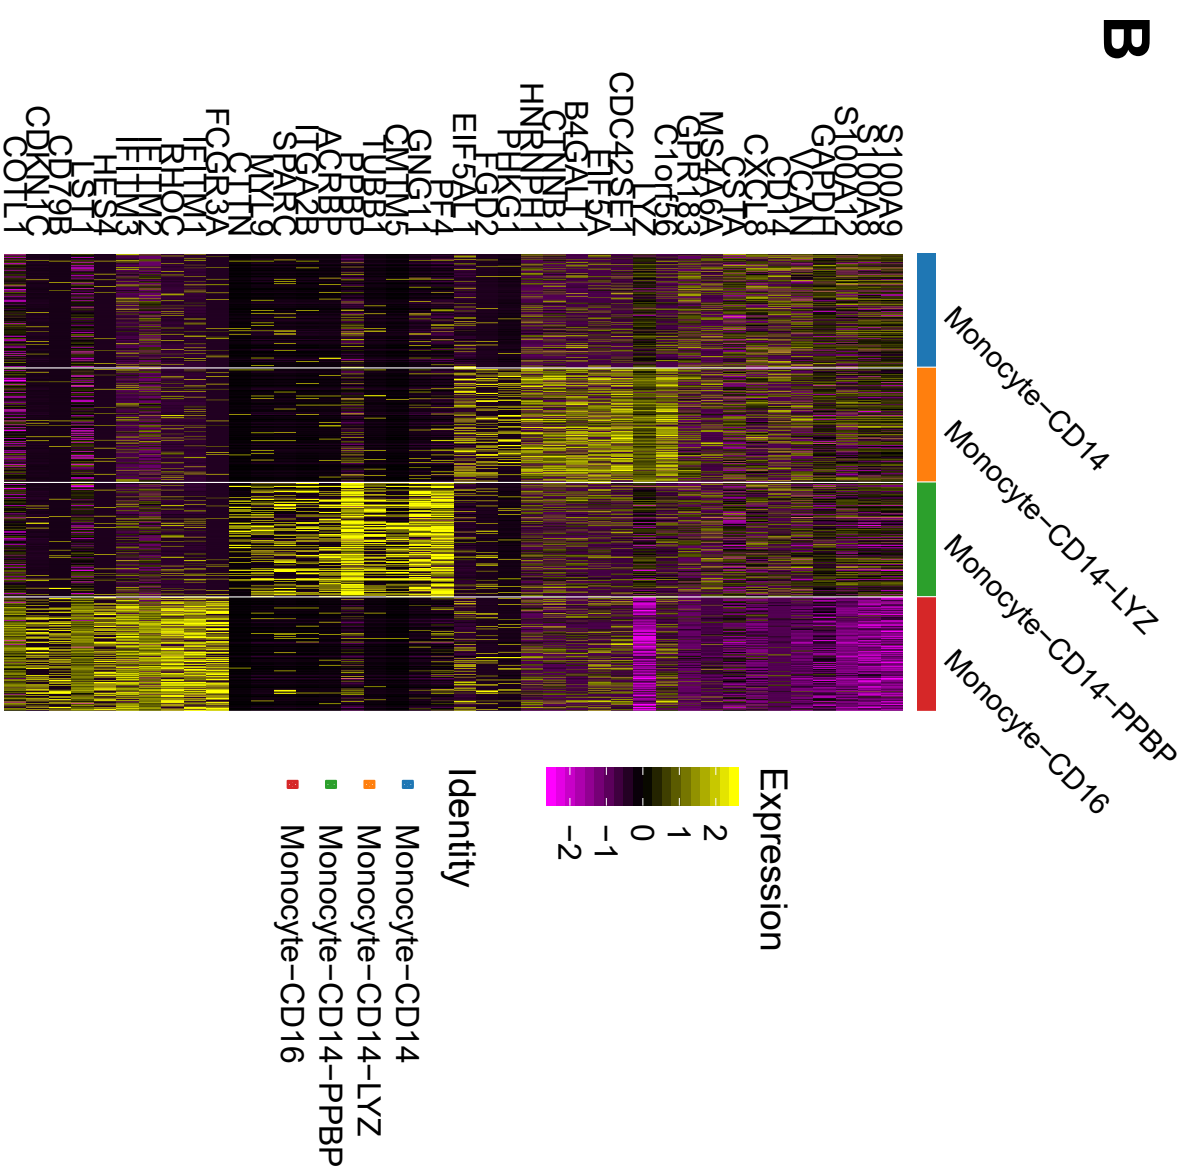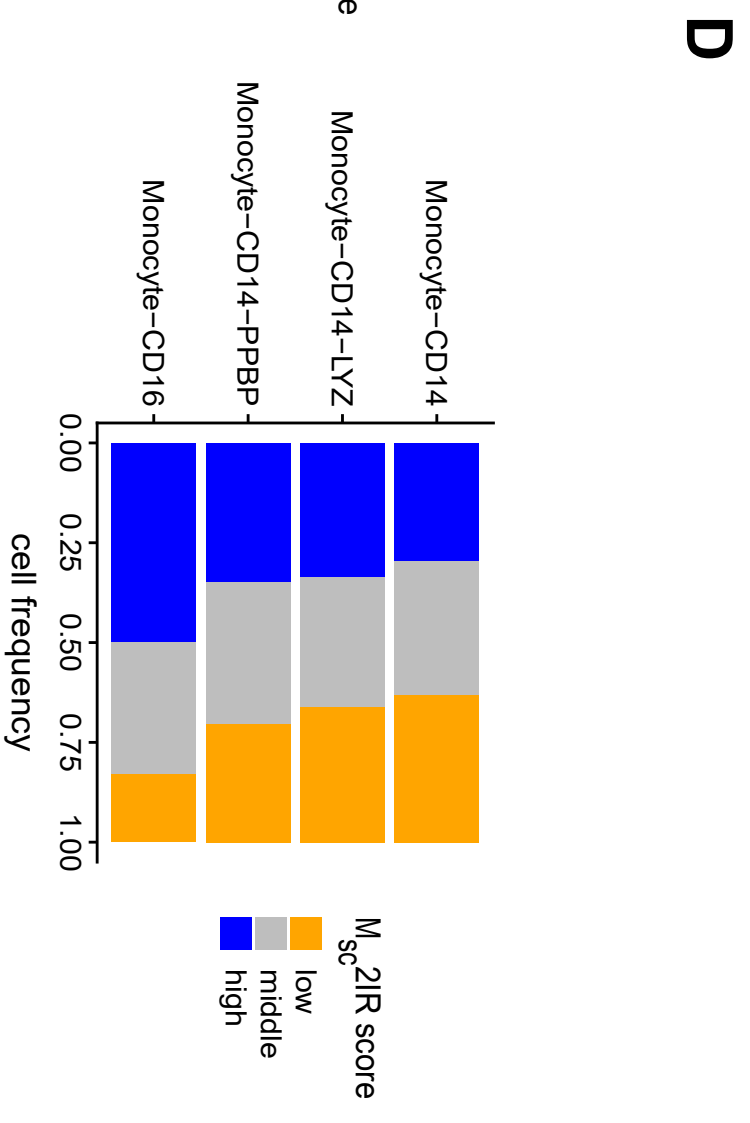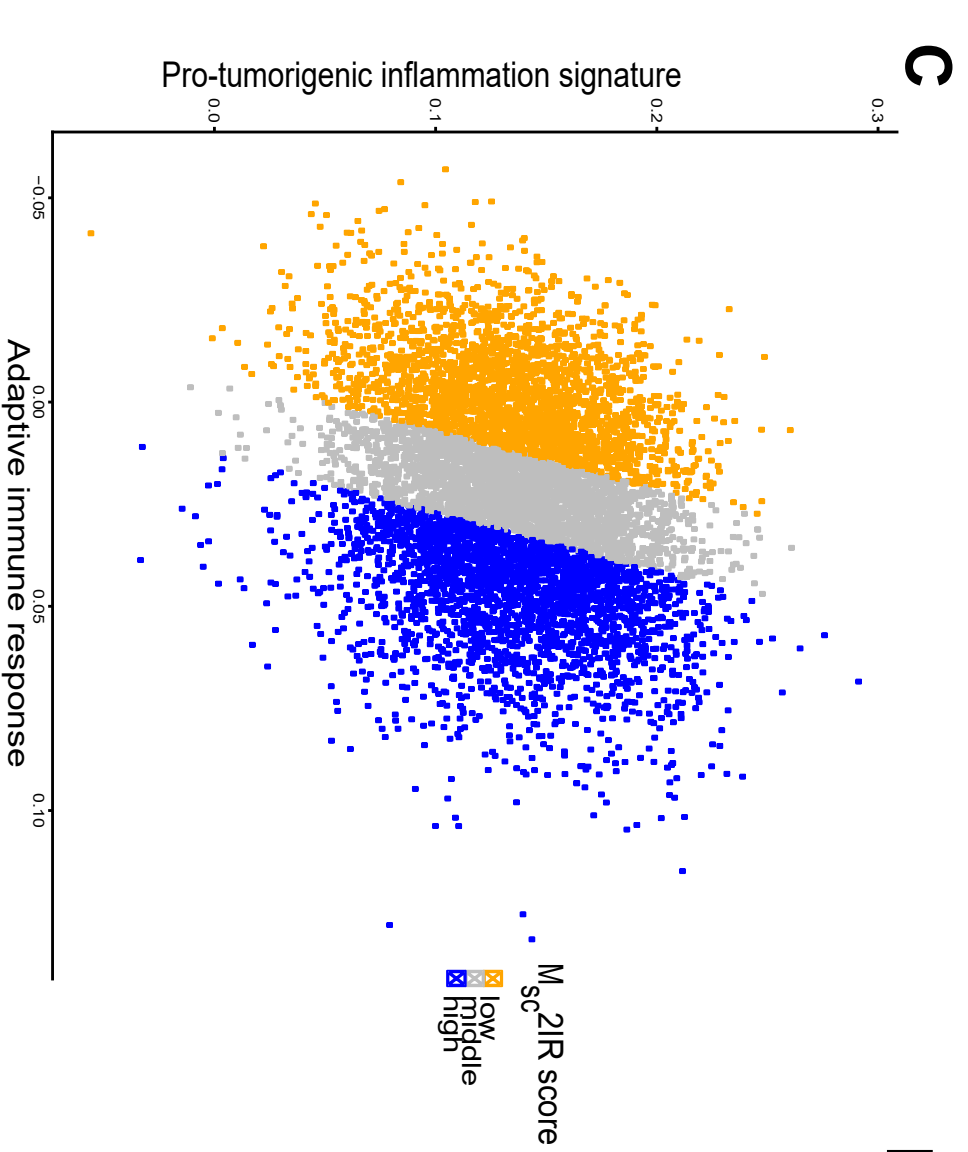

Supplement: NIHMS1683912-supplement-20.pdf [file NIHMS1683912-supplement-20.pdf]

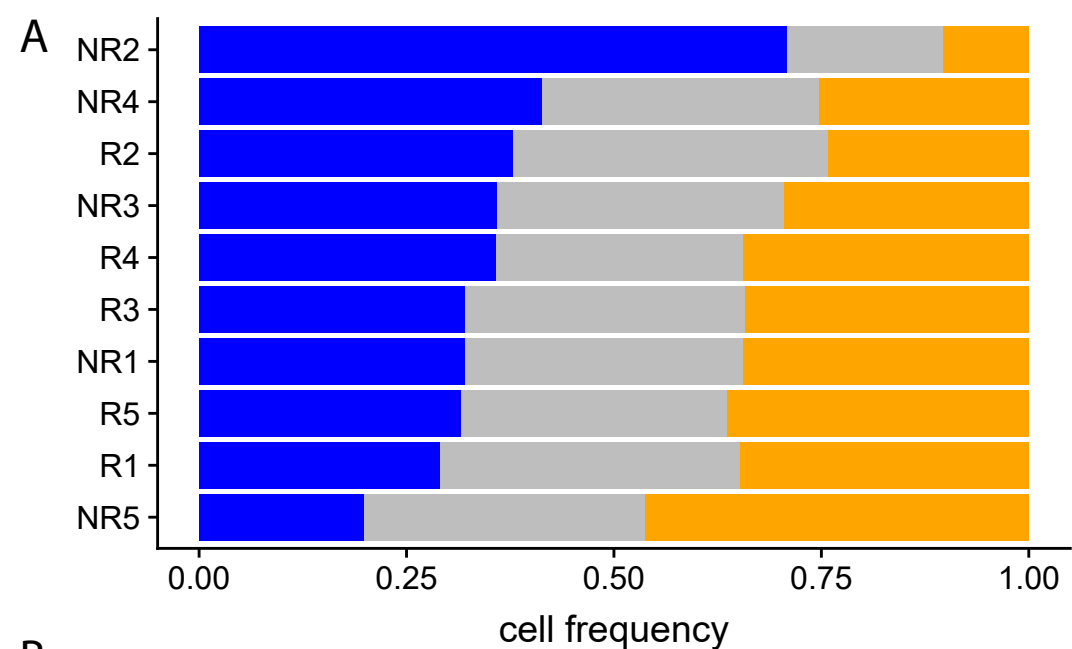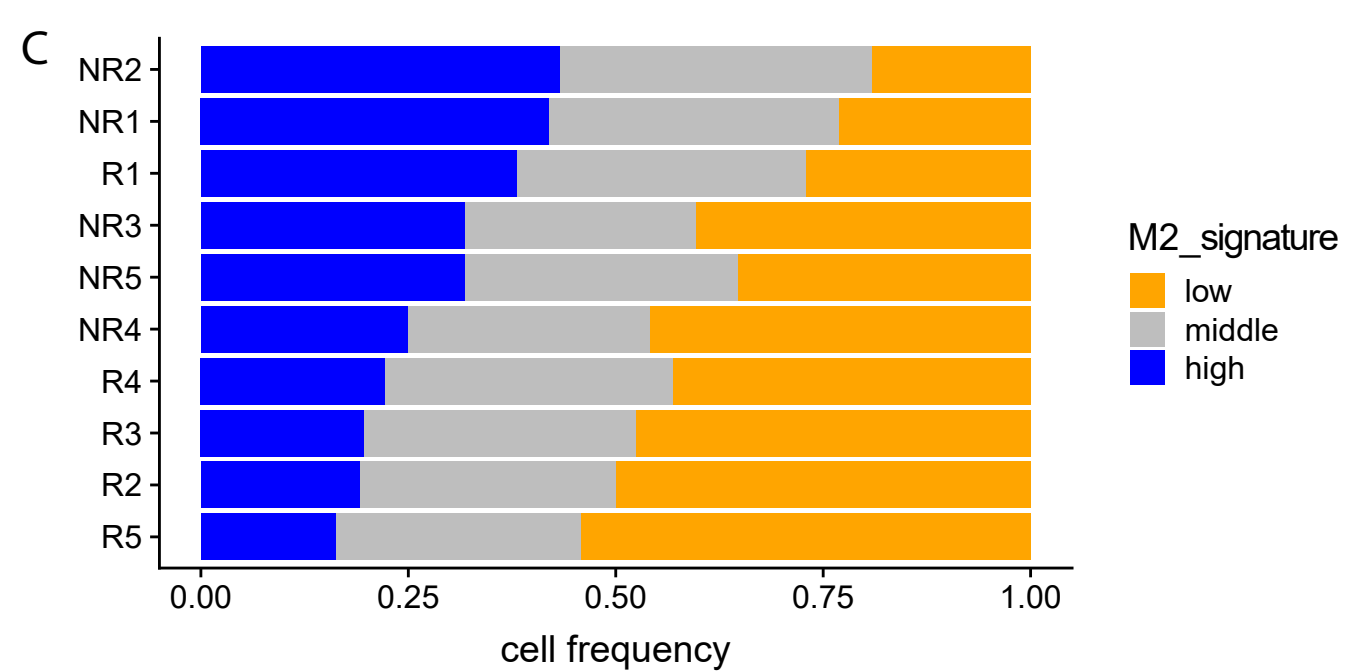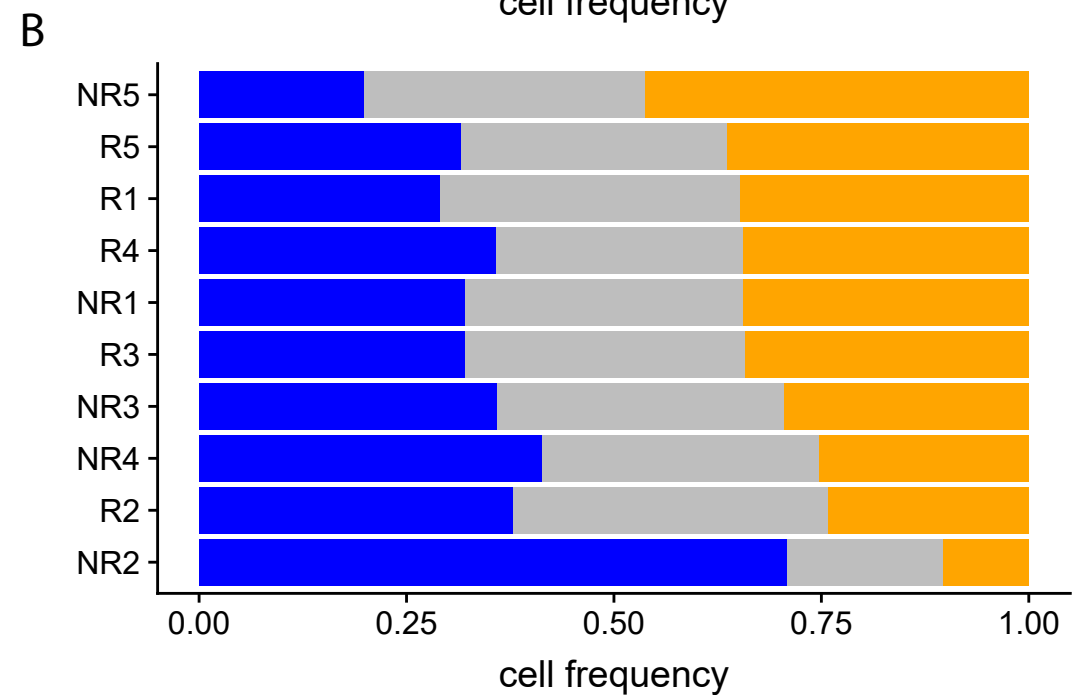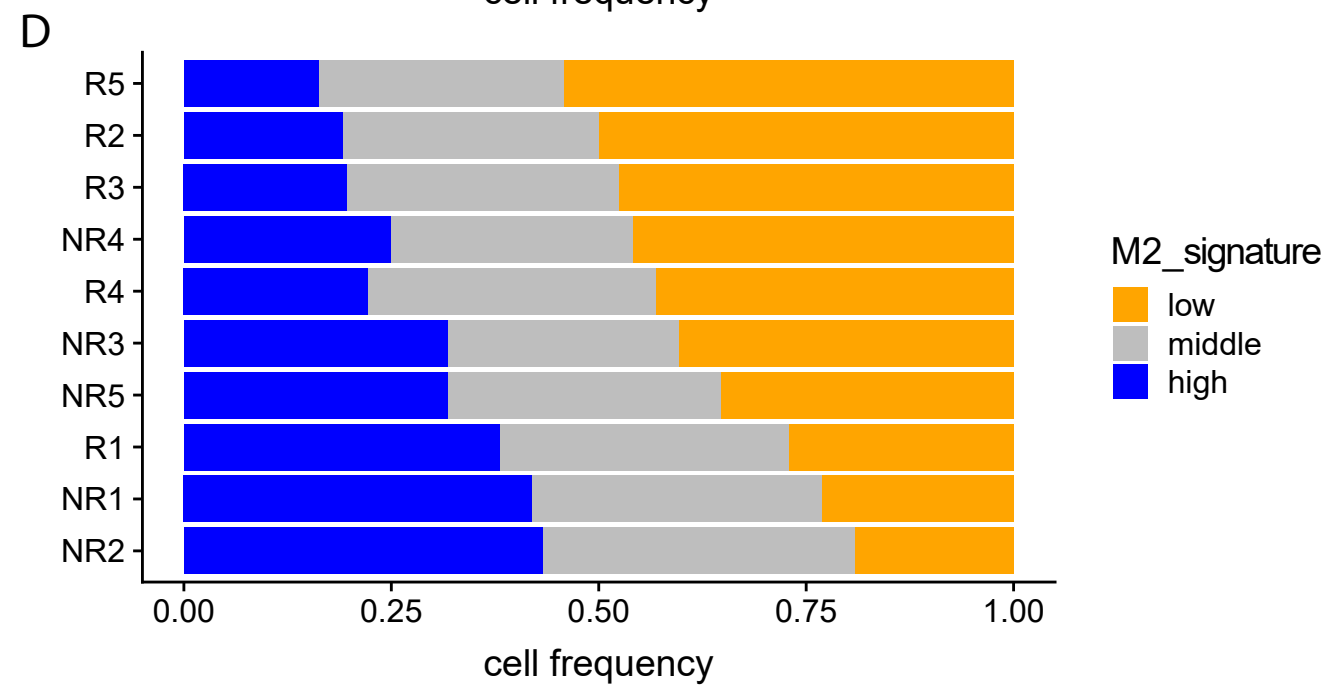

Supplement: NIHMS1683912-supplement-21.pdf [file NIHMS1683912-supplement-21.pdf]

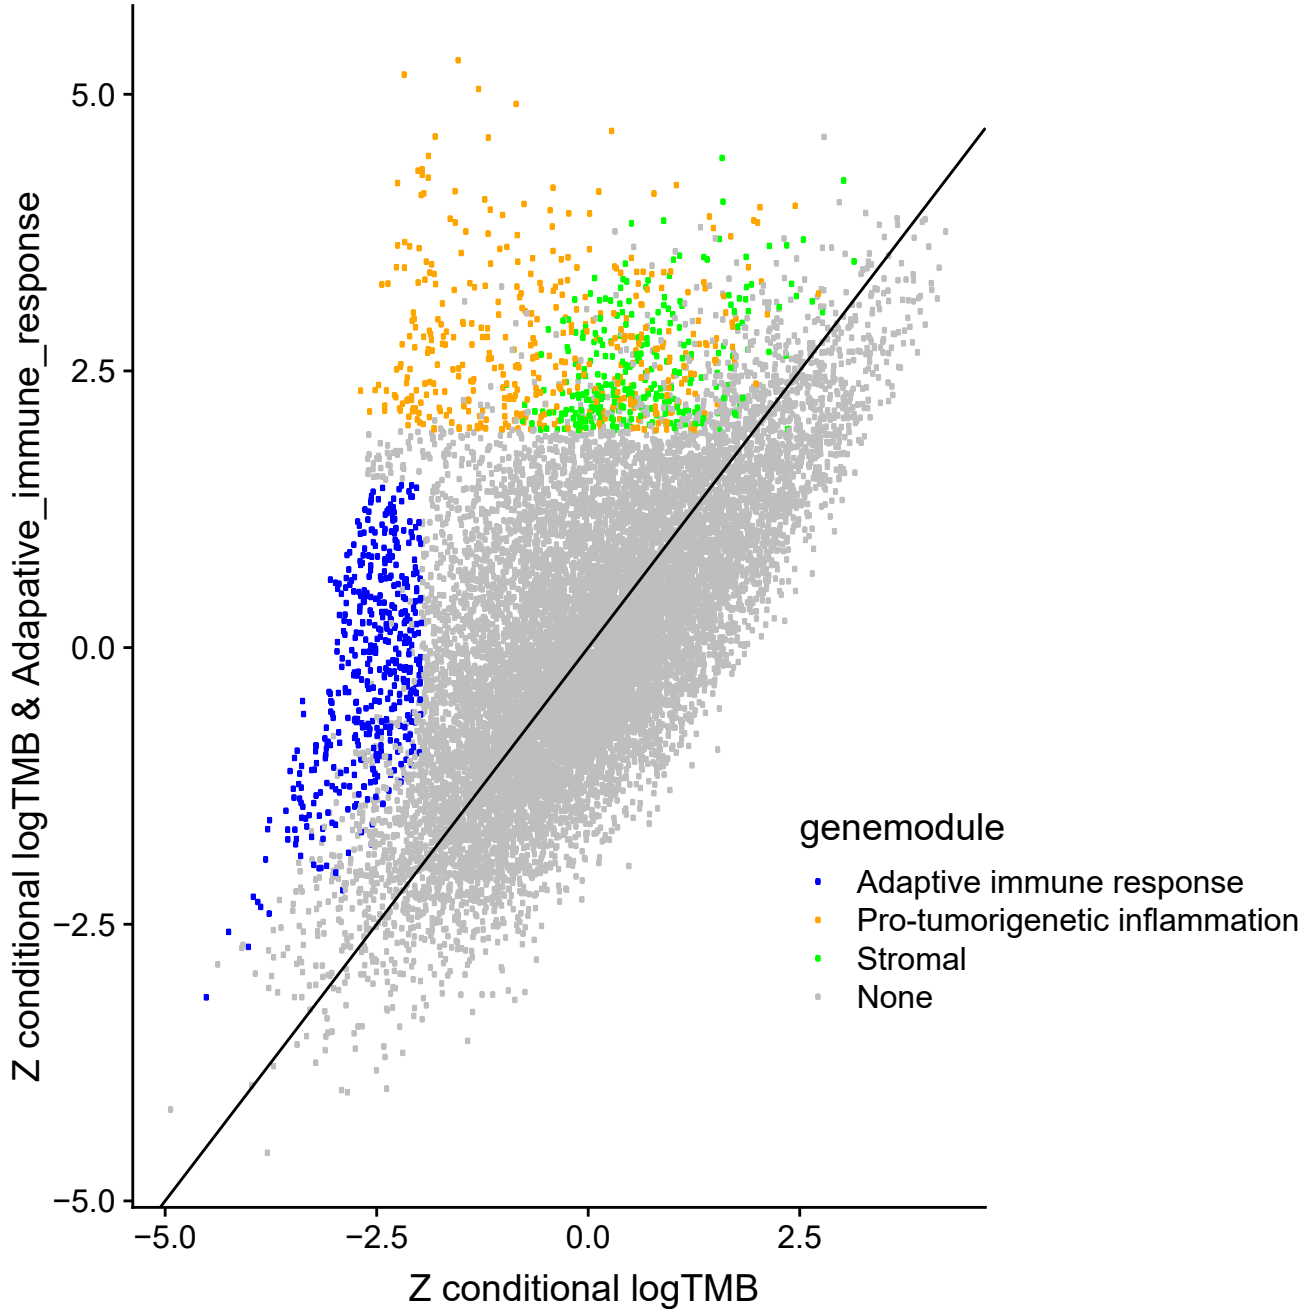

Supplement: NIHMS1683912-supplement-3.pdf [file NIHMS1683912-supplement-3.pdf]

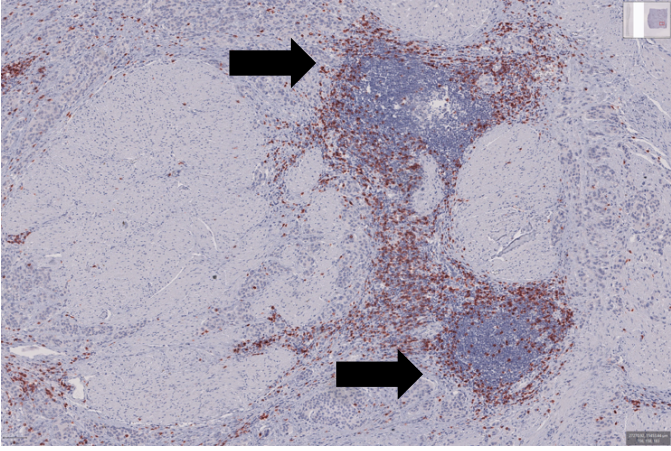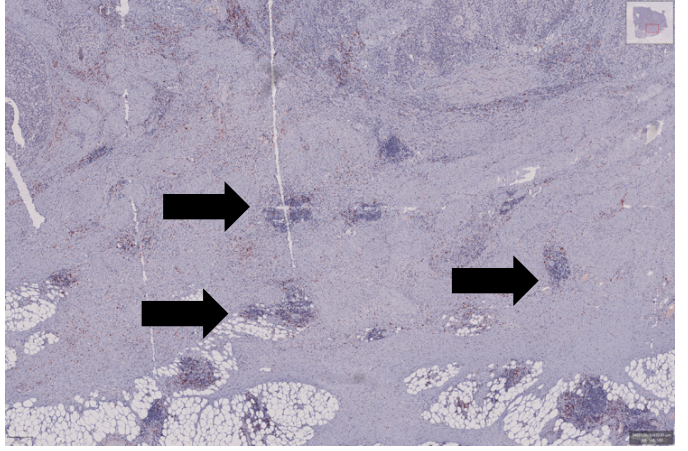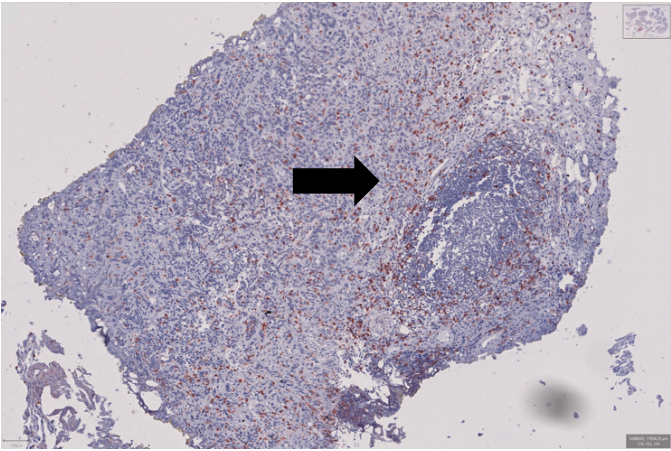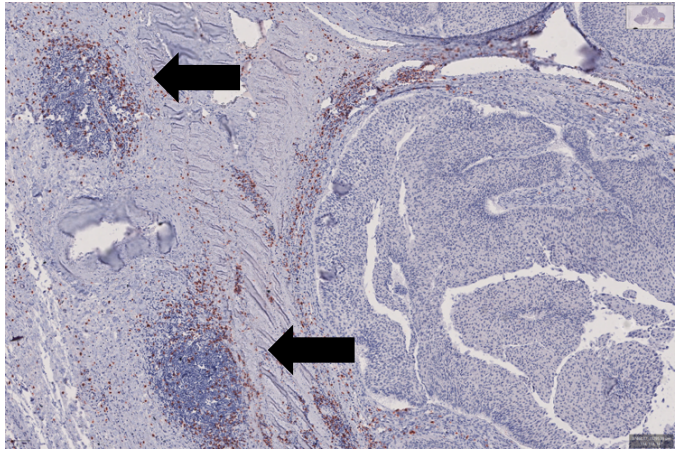

Supplement: NIHMS1683912-supplement-8.pdf [file NIHMS1683912-supplement-8.pdf]

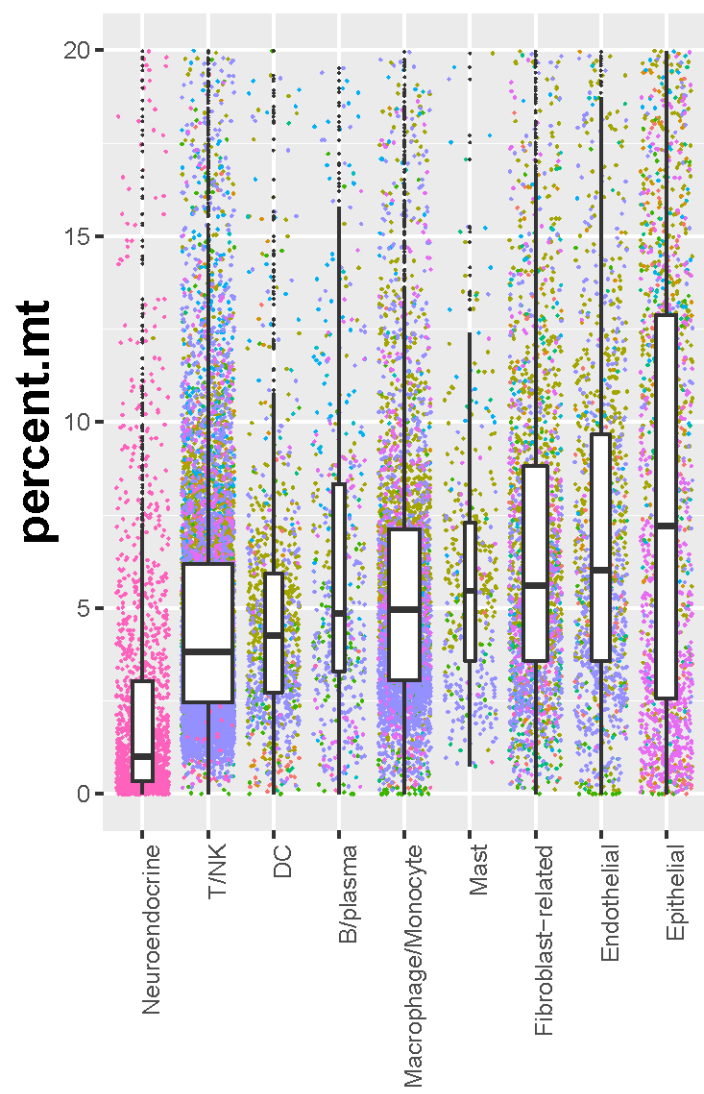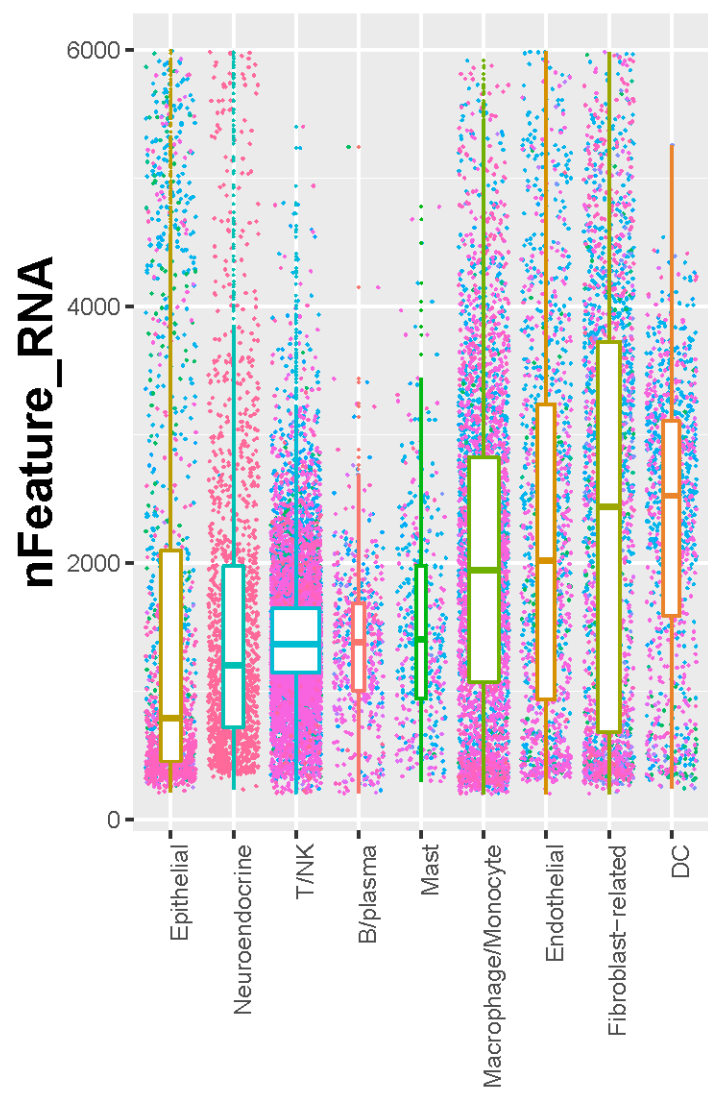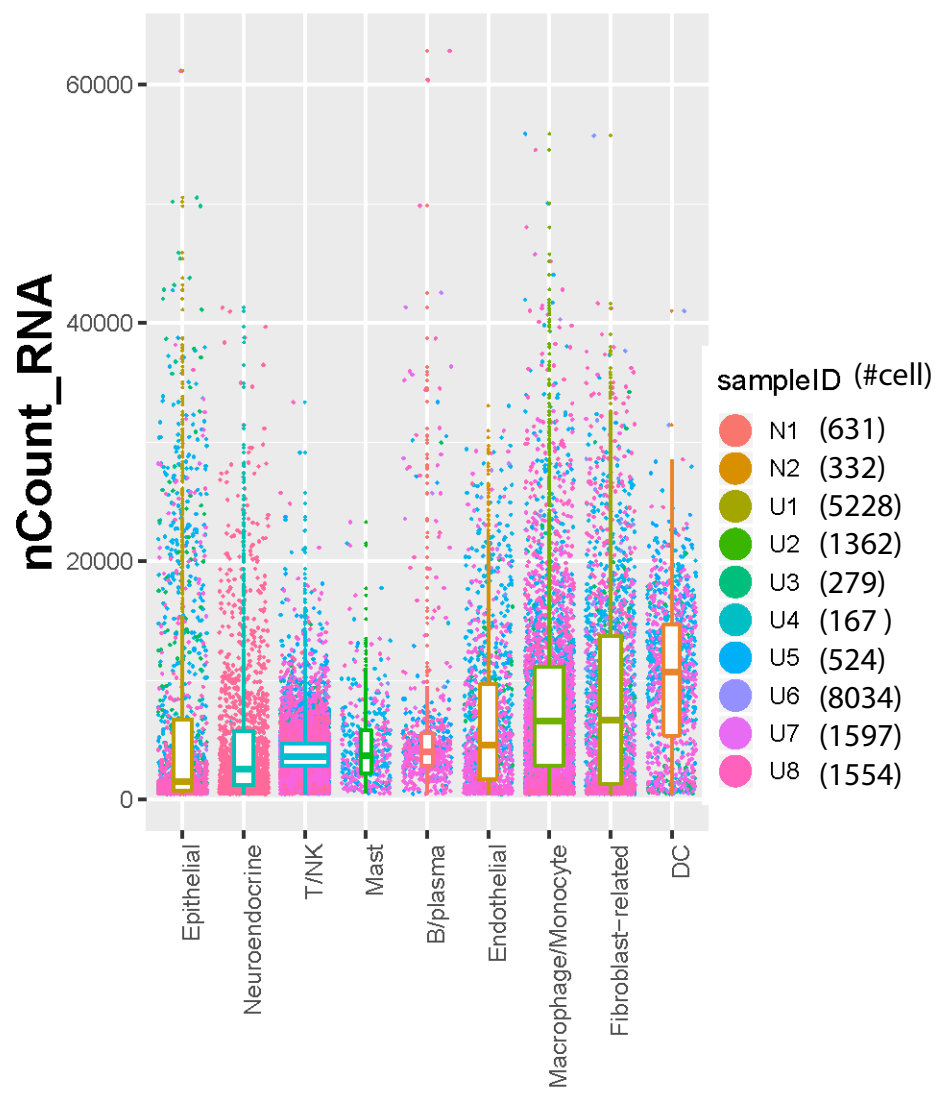

Supplement: NIHMS1683912-supplement-9.pdf [file NIHMS1683912-supplement-9.pdf]
